# Supplementary material for: Influence of acid–base equilibrium on interactions of some monofunctional coumarin Pd(ii) complexes with biologically relevant nucleophiles-comprehensive kinetic study
Source: Royal Society of Chemistry journal article supplement (doi:10.1039/d4dt00789a), 2024-01-01
Supplement: d4dt00789a1.pdf [file d4dt00789a1.pdf]

## Supporting Information

# Influence of acid-base equilibrium on interactions of some monofunctional coumarin Pd(II) complexes with biologically relevant nucleophiles-comprehensive kinetic study

Žiko Milanović<sup>a,\*</sup>, Zoran Marković<sup>a,b</sup>, Ana Kesić<sup>a</sup>, Snežana Jovanović Stević<sup>c</sup>, Biljana Petrović<sup>d</sup>, Edina Avdović<sup>a</sup>

<sup>a</sup>*University of Kragujevac, Institute of Information Technologies, Department of Science, Jovana Cvijića bb, 34000 Kragujevac, Serbia*

<sup>b</sup>*Department of Natural Science and Mathematics, State University of Novi Pazar, Vuka Karadžića bb, 36300, Novi Pazar, Serbia*

<sup>c</sup>*University of Kragujevac, Faculty of Medical Sciences, Department of Pharmacy, Svetozara Markovića 69, 34000 Kragujevac, Serbia*

<sup>d</sup>*University of Kragujevac, Faculty of Science, Department of Chemistry, Radoja Domanovića 12, 34000 Kragujevac, Serbia*

\*Corresponding author's e-mail address: [ziko.milanovic@uni.kg.ac.rs](mailto:ziko.milanovic@uni.kg.ac.rs)

## Table of contents:

| Figure/Table | Title | Page |
|--------------|-------|------|
|--------------|-------|------|

|                  |                                                                                                                                                                                                                                                                                                                                                                                                                                                                                                                  |           |
|------------------|------------------------------------------------------------------------------------------------------------------------------------------------------------------------------------------------------------------------------------------------------------------------------------------------------------------------------------------------------------------------------------------------------------------------------------------------------------------------------------------------------------------|-----------|
| <b>Table S1</b>  | Observed <i>pseudo-first-order</i> rate constants as a function of ligand concentration for the substitution reactions between complex <b>C1</b> and <b>L-Cys</b> in 25 mM Hepes buffer and 50 mM NaCl (pH = 7.2) at 288 K and 298 K                                                                                                                                                                                                                                                                             | <b>9</b>  |
| <b>Table S2</b>  | Observed <i>pseudo-first-order</i> rate constants as a function of ligand concentration for the substitution reactions between complex <b>C1</b> and nucleophiles in 25 mM Hepes buffer and 50 mM NaCl (pH = 7.2) at 310 K                                                                                                                                                                                                                                                                                       | <b>10</b> |
| <b>Table S3</b>  | Observed <i>pseudo-first-order</i> rate constants as a function of ligand concentration for the substitution reactions between complex <b>C2</b> and <b>L-Cys</b> in 25 mM Hepes buffer and 50 mM NaCl (pH = 7.2) at 288 K and 298 K                                                                                                                                                                                                                                                                             | <b>11</b> |
| <b>Table S4</b>  | Observed <i>pseudo-first-order</i> rate constants as a function of ligand concentration for the substitution reactions between complex <b>C2</b> and nucleophiles in 25 mM Hepes buffer and 50 mM NaCl (pH = 7.2) at 310 K.                                                                                                                                                                                                                                                                                      | <b>12</b> |
| <b>Figure S1</b> | Kinetic trace for the reaction of <b>C2</b> complex ( $1 \times 10^{-4} \text{M}$ ) with <b>L-Met</b> ( $4 \times 10^{-3} \text{M}$ ) at pH = 7.2 (25 mM Hepes with addition 50 mM NaCl) and 310 K                                                                                                                                                                                                                                                                                                               | <b>13</b> |
| <b>Figure S2</b> | Eyring plots for the reaction of <b>C1</b> and <b>C2</b> with <b>L-Cys</b> at pH = 7.2 (25 mM HEPES with addition 50mM NaCl).                                                                                                                                                                                                                                                                                                                                                                                    | <b>14</b> |
| <b>Table S5</b>  | Molar fractions ( <i>f</i> , %) of differently represented acid-base species of <b>L-Cys</b> amino acid at different pH values.                                                                                                                                                                                                                                                                                                                                                                                  | <b>14</b> |
| <b>Figure S3</b> | Intrinsic Reaction Coordinate (IRC) diagrams connecting the <b>C1-SH-Cys</b> transition state (TS) with two minima: <i>pre</i> -reaction (PRC) and <i>post</i> -reaction (PoRC) complexes on the singlet potential energy surface obtained with M06-2X functional in conjunction with 6-311++G(d,p) basis set C, N, O, Cl, and H/def2-TZVPD, triple-zeta-valence, basis set for atom Pd. Legend: grey – carbon atom, white – hydrogen atom, red – oxygen atom, blue – nitrogen atom, yellow – sulfur.            | <b>15</b> |
| <b>Figure S4</b> | Intrinsic Reaction Coordinate (IRC) diagrams connecting the <b>C1-O-Cys<sup>-</sup></b> transition state (TS) with two minima: <i>pre</i> -reaction (PRC) and <i>post</i> -reaction (PoRC) complexes on the singlet potential energy surface obtained with M06-2X functional in conjunction with 6-311++G(d,p) basis set C, N, O, Cl, and H/def2-TZVPD, triple-zeta-valence, basis set for atom Pd. Legend: grey – carbon atom, white – hydrogen atom, red – oxygen atom, blue – nitrogen atom, yellow – sulfur. | <b>16</b> |
| <b>Figure S5</b> | Intrinsic Reaction Coordinate (IRC) diagrams connecting the <b>C1-S-Cys<sup>-</sup></b> transition state (TS) with two minima: <i>pre</i> -reaction (PRC) and <i>post</i> -reaction (PoRC) complexes on the singlet potential energy surface obtained with M06-2X functional in conjunction with 6-311++G(d,p) basis set C, N, O, Cl, and H/def2-TZVPD, triple-zeta-valence, basis set for atom Pd. Legend: grey – carbon atom, white – hydrogen atom, red – oxygen atom, blue – nitrogen                        | <b>17</b> |

|                   |                                                                                                                                                                                                                                                                                                                                                                                                                                                                                                                  |           |
|-------------------|------------------------------------------------------------------------------------------------------------------------------------------------------------------------------------------------------------------------------------------------------------------------------------------------------------------------------------------------------------------------------------------------------------------------------------------------------------------------------------------------------------------|-----------|
|                   | atom, yellow – sulfur.                                                                                                                                                                                                                                                                                                                                                                                                                                                                                           |           |
| <b>Figure S6</b>  | Intrinsic Reaction Coordinate (IRC) diagrams connecting the <b>C2-O-Cys</b> transition state (TS) with two minima: <i>pre</i> -reaction (PRC) and <i>post</i> -reaction (PoRC) complexes on the singlet potential energy surface obtained with M06-2X functional in conjunction with 6-311++G(d,p) basis set C, N, O, Cl, and H/def2-TZVPD, triple-zeta-valence, basis set for atom Pd. Legend: grey – carbon atom, white – hydrogen atom, red – oxygen atom, blue – nitrogen atom, yellow – sulfur.             | <b>18</b> |
| <b>Figure S7</b>  | Intrinsic Reaction Coordinate (IRC) diagrams connecting the <b>C2-SH-Cys</b> transition state (TS) with two minima: <i>pre</i> -reaction (PRC) and <i>post</i> -reaction (PoRC) complexes on the singlet potential energy surface obtained with M06-2X functional in conjunction with 6-311++G(d,p) basis set C, N, O, Cl, and H/def2-TZVPD, triple-zeta-valence, basis set for atom Pd. Legend: grey – carbon atom, white – hydrogen atom, red – oxygen atom, blue – nitrogen atom, yellow – sulfur             | <b>19</b> |
| <b>Figure S8</b>  | Intrinsic Reaction Coordinate (IRC) diagrams connecting the <b>C2-O-Cys<sup>-</sup></b> transition state (TS) with two minima: <i>pre</i> -reaction (PRC) and <i>post</i> -reaction (PoRC) complexes on the singlet potential energy surface obtained with M06-2X functional in conjunction with 6-311++G(d,p) basis set C, N, O, Cl, and H/def2-TZVPD, triple-zeta-valence, basis set for atom Pd. Legend: grey – carbon atom, white – hydrogen atom, red – oxygen atom, blue – nitrogen atom, yellow – sulfur. | <b>20</b> |
| <b>Figure S9</b>  | Intrinsic Reaction Coordinate (IRC) diagrams connecting the <b>C2-S-Cys<sup>-</sup></b> transition state (TS) with two minima: <i>pre</i> -reaction (PRC) and <i>post</i> -reaction (PoRC) complexes on the singlet potential energy surface obtained with M06-2X functional in conjunction with 6-311++G(d,p) basis set C, N, O, Cl, and H/def2-TZVPD, triple-zeta-valence, basis set for atom Pd. Legend: grey – carbon atom, white – hydrogen atom, red – oxygen atom, blue – nitrogen atom, yellow – sulfur  | <b>21</b> |
| <b>Table S6</b>   | Summed total energies ( <i>G</i> (Hartree)) of reaction participants (local minima and maxima) obtained from IRC calculations                                                                                                                                                                                                                                                                                                                                                                                    | <b>22</b> |
| <b>Table S7</b>   | The bond length of the interest, the Wiberg bond indices (WBIs), natural atomic charges (NACs), total natural populations (TNPs, in parentheses), and natural electron (NECs) of selected atoms/ions for transition states (TS) of <b>C1</b> compound                                                                                                                                                                                                                                                            | <b>23</b> |
| <b>Table S8</b>   | The bond length of the interest, the Wiberg bond indices (WBIs), natural atomic charges (NACs), total natural populations (TNPs, in parentheses), and natural electron (NECs) of selected atoms/ions for transition states (TS) of <b>C2</b> compound                                                                                                                                                                                                                                                            | <b>24</b> |
| <b>Figure S10</b> | Optimized geometries of <i>pre</i> -reaction ( <b>PRC</b> ) complexes between the investigated compounds, <b>C1</b> and <b>C2</b> , and acid-base forms of <b>L-Cys/L-Cys<sup>-</sup></b> with intramolecular hydrogen bond (interrupted line)                                                                                                                                                                                                                                                                   | <b>25</b> |

|                   |                                                                                                                                                                                                                                                                                                                                                                                                                                                                                                                                          |           |
|-------------------|------------------------------------------------------------------------------------------------------------------------------------------------------------------------------------------------------------------------------------------------------------------------------------------------------------------------------------------------------------------------------------------------------------------------------------------------------------------------------------------------------------------------------------------|-----------|
|                   | obtained with M06-2X functional in conjunction with 6-311++G(d,p) basis set C, N, O, Cl, and H/def2-TZVPD, triple-zeta-valence, basis set for atom Pd theory in the water. Legend: grey – carbon atom, white – hydrogen atom, red – oxygen atom, blue – nitrogen atom, yellow – sulfur                                                                                                                                                                                                                                                   |           |
| <b>Table S9</b>   | The bond length of the interest, the Wiberg bond indices (WBIs), natural atomic charges (NACs), total natural populations (TNPs, in parentheses), and natural electron (NECs) of selected atoms/ions for <i>pre</i> -reaction complexes (PRC) of <b>C1</b> compound                                                                                                                                                                                                                                                                      | <b>26</b> |
| <b>Table S10</b>  | The bond length of the interest, the Wiberg bond indices (WBIs), natural atomic charges (NACs), total natural populations (TNPs, in parentheses), and natural electron (NECs) of selected atoms/ions for <i>pre</i> -reaction complexes (PRC) of <b>C2</b> compound                                                                                                                                                                                                                                                                      | <b>27</b> |
| <b>Figure S11</b> | Optimized geometries of <i>post</i> -reaction ( <b>PoRC</b> ) complexes between the investigated compounds, <b>C1</b> and <b>C2</b> , and acid-base forms of <b>L-Cys/L-Cys<sup>-</sup></b> with intramolecular hydrogen bond (interrupted line) obtained with M06-2X functional in conjunction with 6-311++G(d,p) basis set C, N, O, Cl, and H/def2-TZVPD, triple-zeta-valence, basis set for atom Pd theory in the water. Legend: grey – carbon atom, white – hydrogen atom, red – oxygen atom, blue – nitrogen atom, yellow – sulfur. | <b>28</b> |
| <b>Table S11</b>  | The bond length of the interest, the Wiberg bond indices (WBIs), natural atomic charges (NACs), total natural populations (TNPs, in parentheses), and natural electron (NECs) of selected atoms/ions for <i>post</i> -reaction complexes (PoRC) of <b>C1</b> compound                                                                                                                                                                                                                                                                    | <b>29</b> |
| <b>Table S12</b>  | The bond length of the interest, the Wiberg bond indices (WBIs), natural atomic charges (NACs), total natural populations (TNPs, in parentheses), and natural electron (NECs) of selected atoms/ions for <i>post</i> -reaction complexes (PoRC) of <b>C2</b> compound                                                                                                                                                                                                                                                                    | <b>30</b> |
| <b>Figure S12</b> | Optimized geometries of products formed in the reaction between the investigated compounds, <b>C1</b> and <b>C2</b> , and acid-base forms of <b>L-Cys/L-Cys<sup>-</sup></b> with intramolecular hydrogen bond (interrupted line) obtained with M06-2X functional in conjunction with 6-311++G(d,p) basis set C, N, O, Cl, and H/def2-TZVPD, triple-zeta-valence, basis set for atom Pd theory in the water. Legend: grey – carbon atom, white – hydrogen atom, red – oxygen atom, blue – nitrogen atom, yellow – sulfur                  | <b>31</b> |
| <b>Table S13</b>  | The bond length of the interest, the Wiberg bond indices (WBIs), natural atomic charges (NACs), total natural populations (TNPs, in parentheses), and natural electron (NECs) of selected atoms/ions for products of <b>C1</b> compound                                                                                                                                                                                                                                                                                                  | <b>32</b> |
| <b>Table S14</b>  | The bond length of the interest, the Wiberg bond indices (WBIs), natural atomic charges (NACs), total natural populations (TNPs, in parentheses), and natural electron (NECs) of selected atoms/ions for products of <b>C2</b> compound                                                                                                                                                                                                                                                                                                  | <b>33</b> |
| <b>Table S15</b>  | Calculated values of kinetic parameters: Gibbs activation energy                                                                                                                                                                                                                                                                                                                                                                                                                                                                         | <b>34</b> |

|                   |                                                                                                                                                                                                                                                                                                                                                                                                                                                            |           |
|-------------------|------------------------------------------------------------------------------------------------------------------------------------------------------------------------------------------------------------------------------------------------------------------------------------------------------------------------------------------------------------------------------------------------------------------------------------------------------------|-----------|
|                   | ( $\Delta G_a$ ), reaction rate constants ( $k$ ), effective values of rate constants ( $k^{\text{eff}}$ ) and the sum of effective values of rate constants ( $k^{\text{eff, sum}}$ ) [ $\text{M}^{-1}\text{s}^{-1}$ ] estimated at 288 K and 298 K.                                                                                                                                                                                                      |           |
| <b>Figure S13</b> | Experimental UV-Vis spectra in Hepes buffer (25 mM Hepes and 50 mM NaCl) of <b>C1</b> (red line) and the mixture of <b>C1</b> and L-Cys in the ratio 1:1 (black line)                                                                                                                                                                                                                                                                                      | <b>34</b> |
| <b>Figure S14</b> | Experimental UV-Vis spectrum in Hepes buffer (25 mM Hepes and 50 mM NaCl) of a 1:1 mixture of <b>C1</b> and L-Cys (black line) and simulated spectrum of the <b>C1-S-Cys<sup>-</sup></b> product (orange line). The HOMO and LUMO orbitals involved in electronic transitions are presented with values of orbital energies (black colour) and energy gap (red colour). The sign "*" and the vertical dashed line represent the oscillator strength value. | <b>35</b> |
| <b>Figure S15</b> | Experimental UV-Vis spectrum in Hepes buffer (25 mM Hepes and 50 mM NaCl) of a 1:1 mixture of <b>C1</b> and L-Cys (black line) and simulated spectrum of the <b>C1-O-Cys</b> product (blue line). The HOMO and LUMO orbitals involved in electronic transitions are presented with values of orbital energies (black colour) and energy gap (red colour). The sign "*" and the vertical dashed line represent the oscillator strength value.               | <b>36</b> |
| <b>Figure S16</b> | Experimental UV-Vis spectrum in Hepes buffer (25 mM Hepes and 50 mM NaCl) of a 1:1 mixture of <b>C1</b> and L-Cys (black line) and simulated spectrum of the <b>C1-O-Cys<sup>-</sup></b> product (purple line). The HOMO and LUMO orbitals involved in electronic transitions are presented with values of orbital energies (black colour) and energy gap (red colour). The sign "*" and the vertical dashed line represent the oscillator strength value. | <b>37</b> |
| <b>Figure S17</b> | Experimental UV-Vis spectrum in Hepes buffer (25 mM Hepes and 50 mM NaCl) of a 1:1 mixture of <b>C1</b> and L-Cys (black line) and simulated spectrum of the <b>C1-HS-Cys</b> product (green line). The HOMO and LUMO orbitals involved in electronic transitions are presented with values of orbital energies (black colour) and energy gap (red colour). The sign "*" and the vertical dashed line represent the oscillator strength value.             | <b>38</b> |

To quantify the molar fractions of acid-base species, the relationship between the acid constants ( $Ka$ ) and the  $pK_a$  values as well as the expression for the equilibrium constant of the deprotonation process was used:

$$Ka_1 = 10^{-pKa1} \quad (1s)$$

$$Ka_2 = 10^{-pKa2} \quad (2s)$$

$$Ka_3 = 10^{-pKa3} \quad (3s)$$

$$Ka_4 = 10^{-pKa4} \quad (4s)$$

$$Ka_1 = \frac{[A_n - R^-][H^+]}{[A_n - RH]} \quad (5s)$$

$$Ka_2 = \frac{[A_n - R^{2-}][H^+]}{[A_n - R^-]} \quad (6s)$$

$$Ka_3 = \frac{[A_n - R^{3-}][H^+]}{[A_n - R^{2-}]} \quad (7s)$$

$$Ka_4 = \frac{[A_n - R^{4-}][H^+]}{[A_n - R^{3-}]} \quad (8s)$$

Molar fractions ( $f$ ) of the represented acid-base species, were calculated using the following equations:

$$f(A_n - R^{4-}) = \frac{1}{1 + \beta_1 [H^+] + \beta_2 [H^+]^2 + \beta_3 [H^+]^3 + \beta_4 [H^+]^4} \quad (9s)$$

$$f(A_n - R^{3-}) = \beta_1 [H^+] f(A_n - R^{4-}) \quad (10s)$$

$$f(A_n - R^{2-}) = \beta_2 [H^+]^2 f(A_n - R^{3-}) \quad (11s)$$

$$f(A_n - R^-) = \beta_3 [H^+]^3 f(A_n - R^{2-}) \quad (12s)$$

where  $[H^+]$  represents the concentration of hydrogen ions at physiological pH in this case ( $[H^+] = 3.98 \times 10^{-8} \text{ M}$ ), while  $\beta$  represents global formation equilibrium constants:

$$\beta_1 = 10^{pKa4} \quad (13s)$$

$$\beta_2 = 10^{pKa4 + pKa3} \quad (14s)$$

$$\beta_3 = 10^{pKa4 + pKa3 + pKa2} \quad (15s)$$

$$\beta_4 = 10^{pKa4 + pKa3 + pKa2 + pKa1} \quad (16s)$$

**Table S1.** Observed *pseudo-first-order* rate constants as a function of ligand concentration for the substitution reactions between complex **C1** and **L-Cys** in 25 mM Hepes buffer and 50 mM NaCl (pH = 7.2) at 288 K and 298 K.

| <b>Ligand</b> | <b>T [K]</b> | <b><math>\lambda</math> [nm]</b> | <b><math>10^3 C_L</math> [M]</b> | <b><math>k_{\text{obsd}}</math> [<math>s^{-1}</math>]</b> |
|---------------|--------------|----------------------------------|----------------------------------|-----------------------------------------------------------|
| <b>L-Cys</b>  | 288          | 260                              | 1                                | 53.85(6) <sup>a</sup>                                     |
|               |              |                                  | 2                                | 97.80(6)                                                  |
|               |              |                                  | 3                                | 140.66(5)                                                 |
|               |              |                                  | 4                                | 200.34(4)                                                 |
|               |              |                                  | 5                                | 246.45(5)                                                 |
|               | 298          |                                  | 1                                | 61.10(4)                                                  |
|               |              |                                  | 2                                | 112.68(6)                                                 |
|               |              |                                  | 3                                | 171.90(5)                                                 |
|               |              |                                  | 4                                | 230.10(6)                                                 |
|               |              |                                  | 5                                | 290.70(5)                                                 |

<sup>a</sup>Number of runs in parenthesis



**Table S2.** Observed *pseudo-first-order* rate constants as a function of ligand concentration for the substitution reactions between complex **C1** and nucleophiles in 25 mM Hepes buffer and 50 mM NaCl (pH = 7.2) at 310 K.

| <b>Nucleophile</b> | $\lambda/\text{nm}$ | $10^3\text{C}_L/\text{M}$ | $k_{\text{obsd}}/\text{s}^{-1}$ |
|--------------------|---------------------|---------------------------|---------------------------------|
| <b>L-Cys</b>       | 260                 | 1                         | 68.98(6) <sup>a</sup>           |
|                    |                     | 2                         | 160.05(5)                       |
|                    |                     | 3                         | 250.58(5)                       |
|                    |                     | 4                         | 307.36(6)                       |
|                    |                     | 5                         | 374.06(5)                       |
| <b>L-Met</b>       | 285                 | 1                         | 14.83(4)                        |
|                    |                     | 2                         | 31.52(5)                        |
|                    |                     | 3                         | 45.90(5)                        |
|                    |                     | 4                         | 61.47(4)                        |
|                    |                     | 5                         | 76.33(6)                        |
| <b>5'-GMP</b>      | 315                 | 1                         | 2.90(4)                         |
|                    |                     | 2                         | 5.20(6)                         |
|                    |                     | 3                         | 7.29(4)                         |
|                    |                     | 4                         | 10.57(6)                        |
|                    |                     | 5                         | 13.10(5)                        |

<sup>a</sup>Number of runs in parenthesis.

**Table S3.** Observed *pseudo-first-order* rate constants as a function of ligand concentration for the substitution reactions between complex **C2** and **L-Cys** in 25 mM Hepes buffer and 50 mM NaCl (pH = 7.2) at 288 K and 298 K.

| Ligand | T [K] | $\lambda$ [nm] | $10^3 C_L$ [M] | $k_{\text{obsd}}$ [ $s^{-1}$ ] |
|--------|-------|----------------|----------------|--------------------------------|
| L-Cys  | 288   | 265            | 1              | 76.60(5) <sup>a</sup>          |
|        |       |                | 2              | 138.44(6)                      |
|        |       |                | 3              | 208.10(5)                      |
|        |       |                | 4              | 278.54(5)                      |
|        |       |                | 5              | 347.90(5)                      |
|        | 298   |                | 1              | 87.20(5)                       |
|        |       |                | 2              | 160.77(6)                      |
|        |       |                | 3              | 255.50(5)                      |
|        |       |                | 4              | 320.68(4)                      |
|        |       |                | 5              | 408.80(5)                      |

<sup>a</sup>Number of runs in parenthesis

**Table S4.** Observed *pseudo-first-order* rate constants as a function of ligand concentration for the substitution reactions between complex **C2** and nucleophiles in 25 mM Hepes buffer and 50 mM NaCl (pH = 7.2) at 310 K.

| <b>Nucleophile</b> | <b><math>\lambda/\text{nm}</math></b> | <b><math>10^3\text{C}_L/\text{M}</math></b> | <b><math>k_{\text{obsd}}/\text{s}^{-1}</math></b> |
|--------------------|---------------------------------------|---------------------------------------------|---------------------------------------------------|
|                    |                                       | 1                                           | 97.74(5) <sup>a</sup>                             |
|                    |                                       | 2                                           | 232.70(5)                                         |
| <b>L-Cys</b>       | 265                                   | 3                                           | 393.94(5)                                         |
|                    |                                       | 4                                           | 460.87(4)                                         |
|                    |                                       | 5                                           | 551.49(5)                                         |
|                    |                                       | 1                                           | 23.91(5)                                          |
|                    |                                       | 2                                           | 43.60(5)                                          |
| <b>L-Met</b>       | 280                                   | 3                                           | 64.05(5)                                          |
|                    |                                       | 4                                           | 85.89(4)                                          |
|                    |                                       | 5                                           | 112.56(6)                                         |
|                    |                                       | 1                                           | 6.39(5)                                           |
|                    |                                       | 2                                           | 13.66(6)                                          |
| <b>5'-GMP</b>      | 320                                   | 3                                           | 20.59(6)                                          |
|                    |                                       | 4                                           | 25.70(6)                                          |
|                    |                                       | 5                                           | 32.88(5)                                          |

<sup>a</sup>Number of runs in parenthesis.

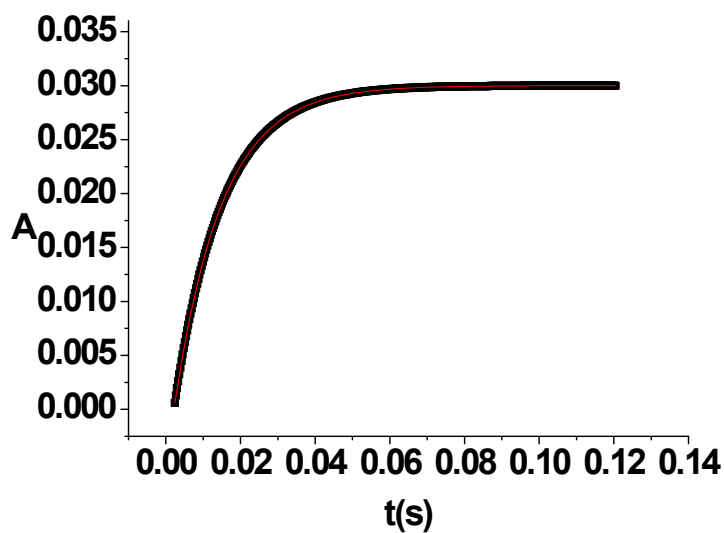

**Figure S1.** Kinetic trace for the reaction of C2 complex ( $1 \times 10^{-4} \text{M}$ ) with L-Met ( $4 \times 10^{-3} \text{M}$ ) at pH = 7.2 (25 mM Hepes with addition 50 mM NaCl) and 310 K.

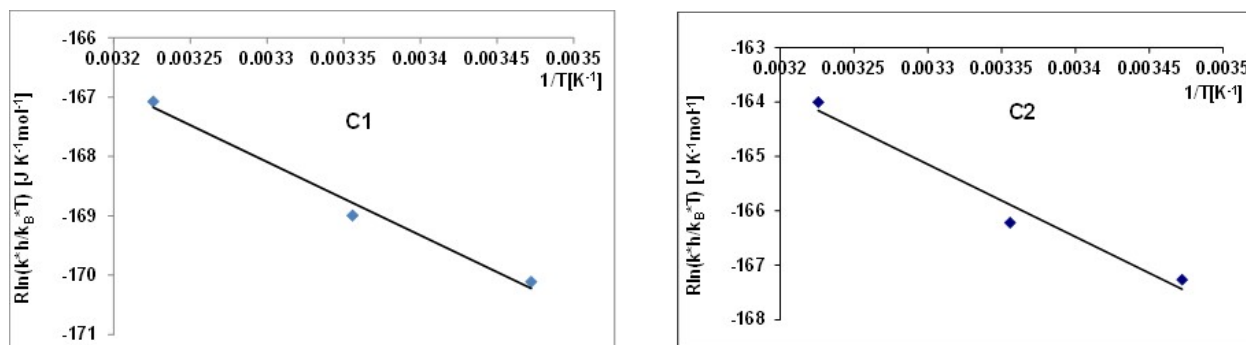

**Figure S2.** Eyring plots for the reaction of C1 and C2 with L-Cys at pH = 7.2 (25 mM HEPES with addition 50mM NaCl).

**Table S5.** Molar fractions (*f*, %) of differently represented acid-base species of L-Cys amino acid at different pH values.

| pH         | L-Cys <sup>+</sup> | L-Cys        | L-Cys <sup>-</sup> | L-Cys <sup>2-</sup> |
|------------|--------------------|--------------|--------------------|---------------------|
| 0.0        | 99.12              | 0.88         | 0.00               | 0.00                |
| 1.0        | 91.82              | 8.18         | 0.00               | 0.00                |
| 2.0        | 52.88              | 47.12        | 0.00               | 0.00                |
| 3.0        | 10.09              | 89.91        | 0.00               | 0.00                |
| 4.0        | 1.11               | 98.88        | 0.01               | 0.00                |
| 5.0        | 0.11               | 99.79        | 0.10               | 0.00                |
| 6.0        | 0.01               | 99.00        | 0.99               | 0.00                |
| 7.0        | 0.00               | 90.90        | 9.09               | 0.01                |
| <b>7.2</b> | <b>0.00</b>        | <b>86.31</b> | <b>13.68</b>       | <b>0.01</b>         |
| 8.0        | 0.00               | 49.86        | 49.86              | 0.28                |
| 9.0        | 0.00               | 8.65         | 86.49              | 4.86                |
| 10.0       | 0.00               | 0.64         | 63.60              | 35.76               |
| 11.0       | 0.00               | 0.02         | 15.10              | 84.89               |
| 12.0       | 0.00               | 0.00         | 1.75               | 98.25               |
| 13.0       | 0.00               | 0.00         | 0.18               | 99.82               |
| 14.0       | 0.00               | 0.00         | 0.02               | 99.98               |

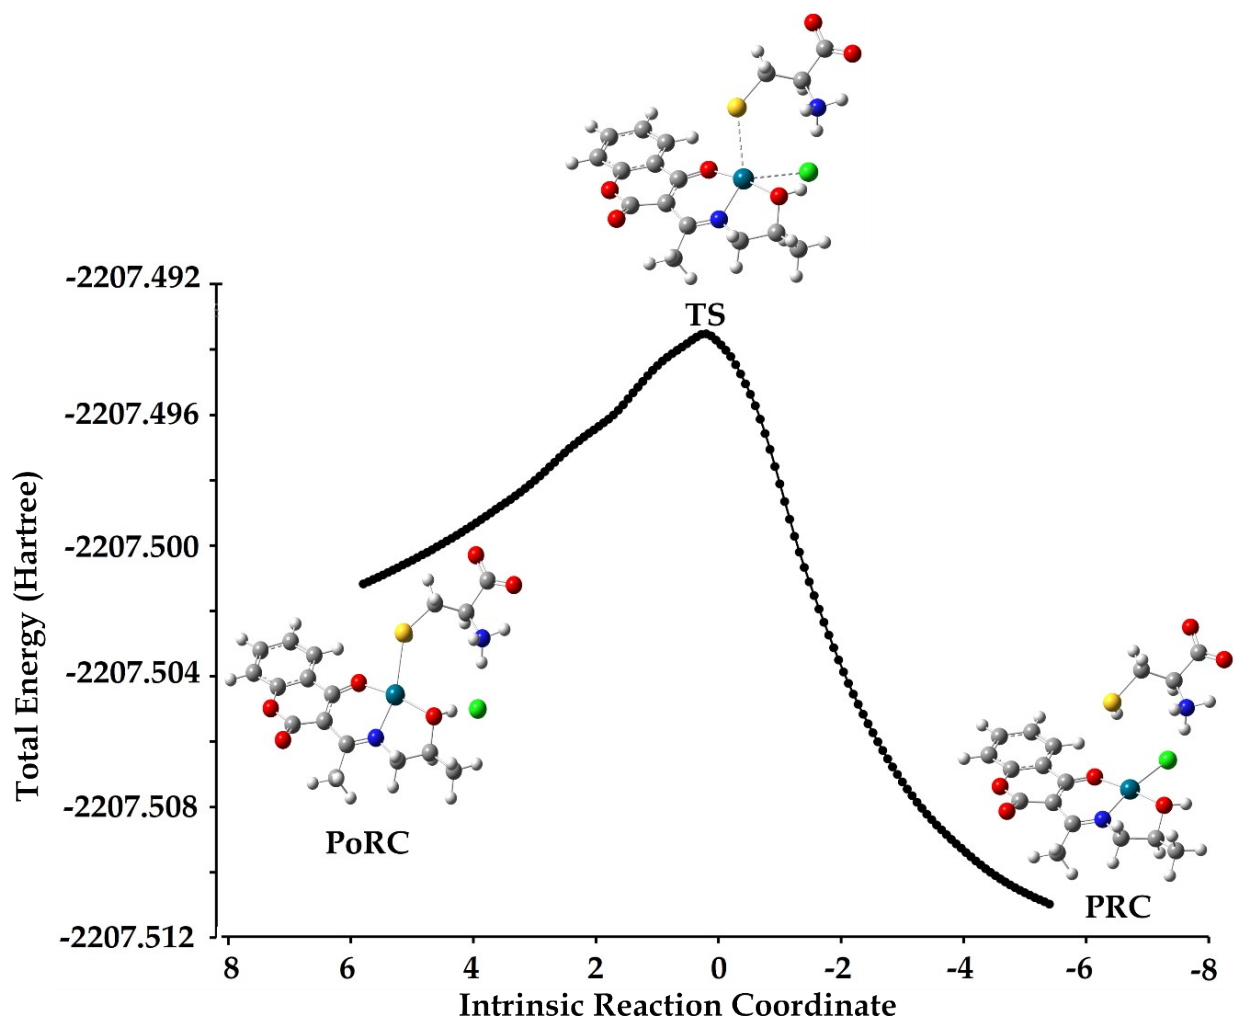

**Figure S3.** Intrinsic Reaction Coordinate (IRC) diagrams connecting the **C1-SH-Cys** transition state (TS) with two minima: *pre*-reaction (PRC) and *post*-reaction (PoRC) complexes on the singlet potential energy surface obtained with M06-2X functional in conjunction with 6-311++G(d,p) basis set C, N, O, Cl, and H/def2-TZVPD, triple-zeta-valence, basis set for atom Pd. Legend: grey – carbon atom, white – hydrogen atom, red – oxygen atom, blue – nitrogen atom, yellow – sulfur.

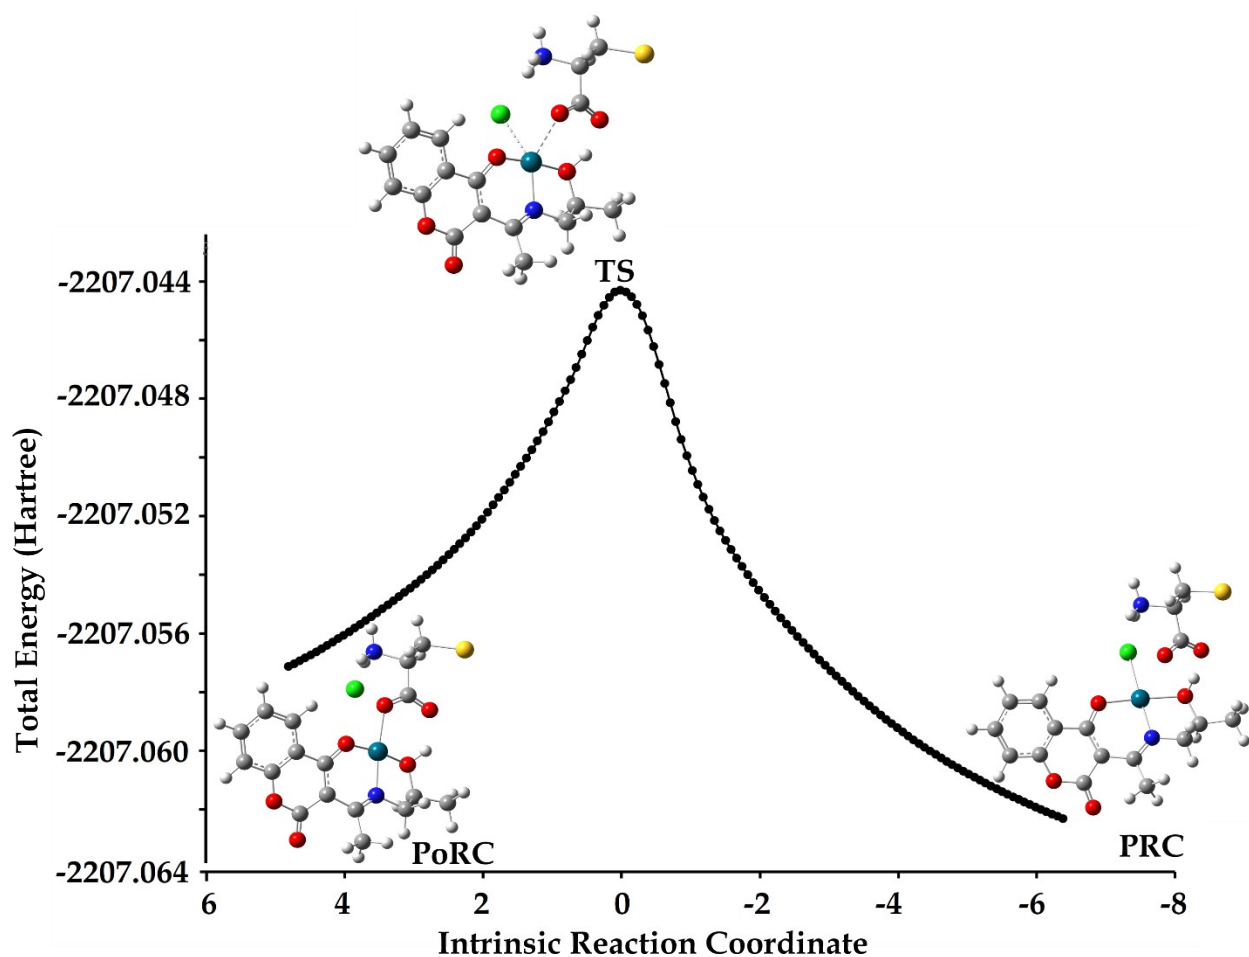

**Figure S4.** Intrinsic Reaction Coordinate (IRC) diagrams connecting the C1-O-Cys<sup>-</sup> transition state (TS) with two minima: *pre*-reaction (PRC) and *post*-reaction (PoRC) complexes on the singlet potential energy surface obtained with M06-2X functional in conjunction with 6-311++G(d,p) basis set C, N, O, Cl, and H/def2-TZVPD, triple-zeta-valence, basis set for atom Pd. Legend: grey – carbon atom, white – hydrogen atom, red – oxygen atom, blue – nitrogen atom, yellow – sulfur.

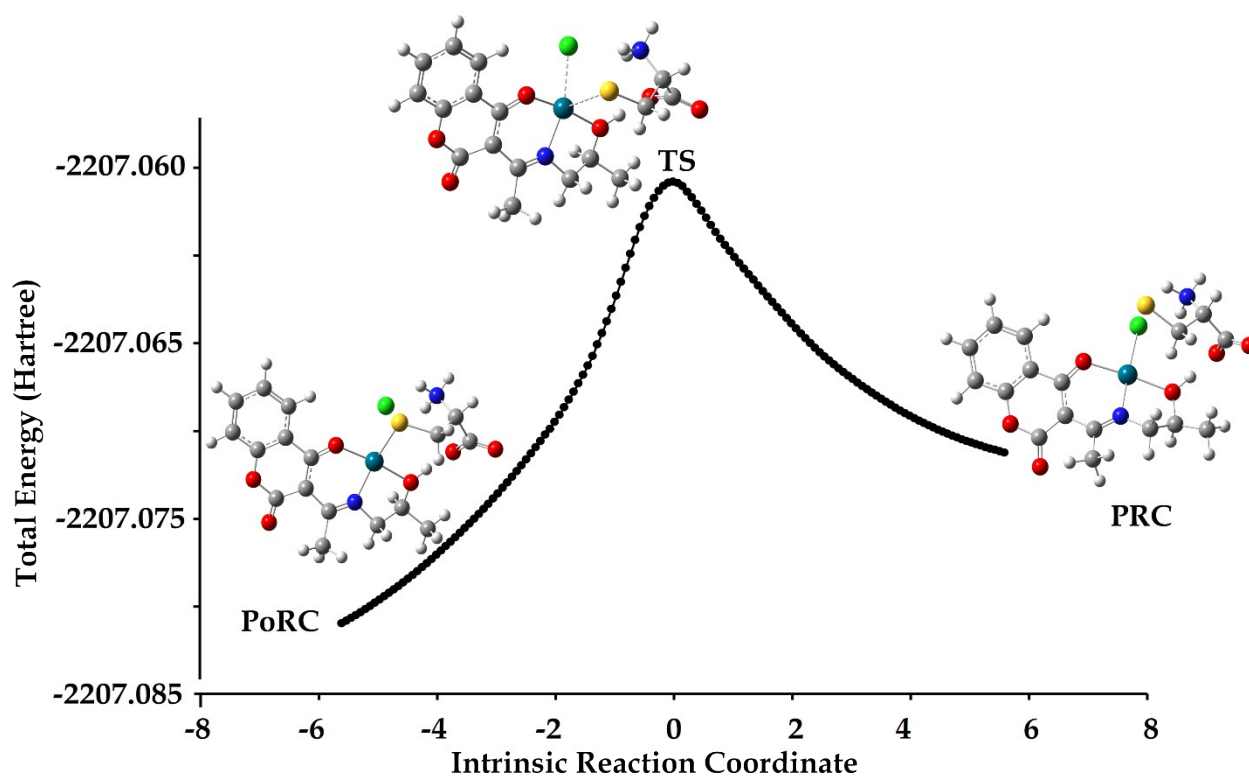

**Figure S5.** Intrinsic Reaction Coordinate (IRC) diagrams connecting the **C1-S-Cys<sup>-</sup>** transition state (TS) with two minima: *pre*-reaction (PRC) and *post*-reaction (PoRC) complexes on the singlet potential energy surface obtained with M06-2X functional in conjunction with 6-311++G(d,p) basis set C, N, O, Cl, and H/def2-TZVPD, triple-zeta-valence, basis set for atom Pd. Legend: grey – carbon atom, white – hydrogen atom, red – oxygen atom, blue – nitrogen atom, yellow – sulfur.



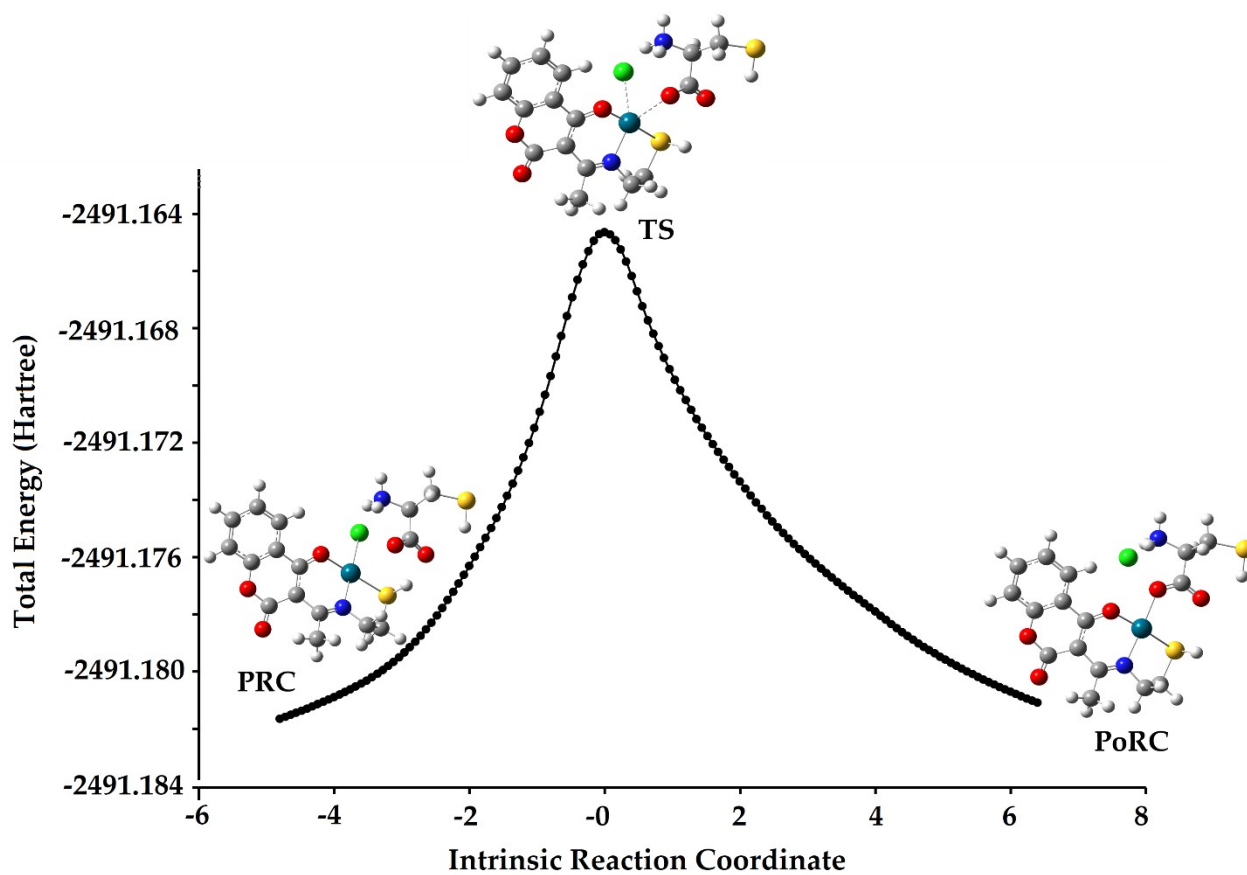

**Figure S6.** Intrinsic Reaction Coordinate (IRC) diagrams connecting the **C2-O-Cys** transition state (TS) with two minima: *pre*-reaction (PRC) and *post*-reaction (PoRC) complexes on the singlet potential energy surface obtained with M06-2X functional in conjunction with 6-311++G(d,p) basis set C, N, O, Cl, and H/def2-TZVPD, triple-zeta-valence, basis set for atom Pd. Legend: grey – carbon atom, white – hydrogen atom, red – oxygen atom, blue – nitrogen atom, yellow – sulfur.

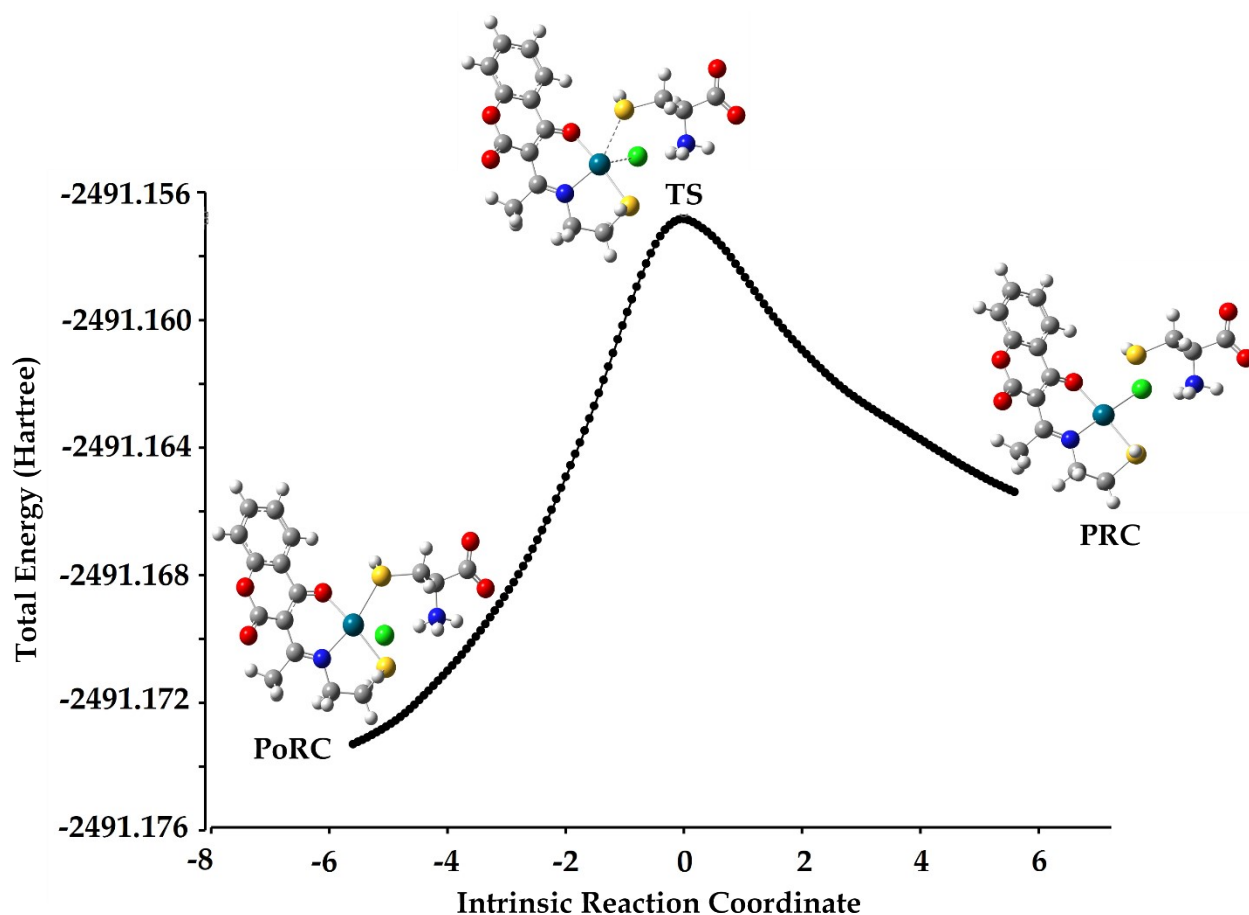

**Figure S7.** Intrinsic Reaction Coordinate (IRC) diagrams connecting the **C2-SH-Cys** transition state (TS) with two minima: *pre*-reaction (PRC) and *post*-reaction (PoRC) complexes on the singlet potential energy surface obtained with M06-2X functional in conjunction with 6-311++G(d,p) basis set C, N, O, Cl, and H/def2-TZVPD, triple-zeta-valence, basis set for atom Pd. Legend: grey – carbon atom, white – hydrogen atom, red – oxygen atom, blue – nitrogen atom, yellow – sulfur.

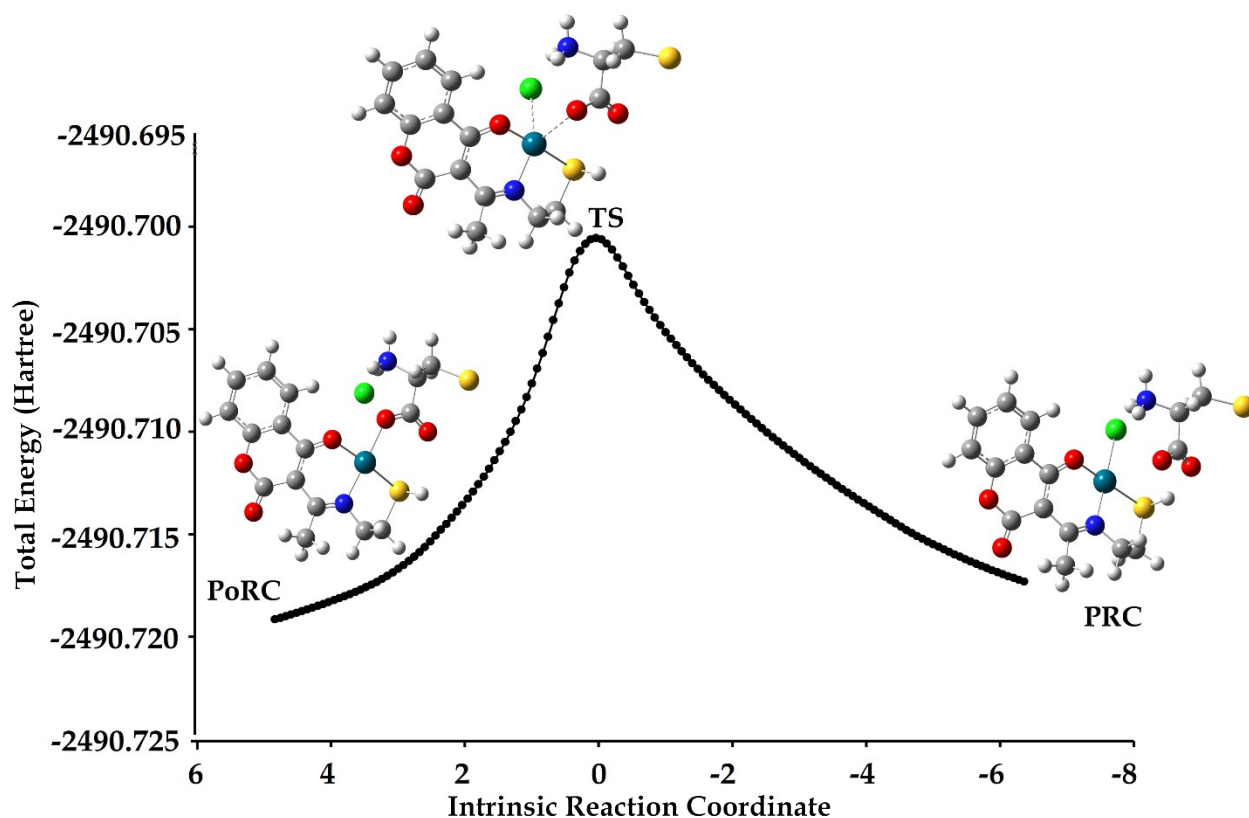

**Figure S8.** Intrinsic Reaction Coordinate (IRC) diagrams connecting the C2-O-Cys<sup>-</sup> transition state (TS) with two minima: *pre*-reaction (PRC) and *post*-reaction (PoRC) complexes on the singlet potential energy surface obtained with M06-2X functional in conjunction with 6-311++G(d,p) basis set C, N, O, Cl, and H/def2-TZVPD, triple-zeta-valence, basis set for atom Pd. Legend: grey – carbon atom, white – hydrogen atom, red – oxygen atom, blue – nitrogen atom, yellow – sulfur.

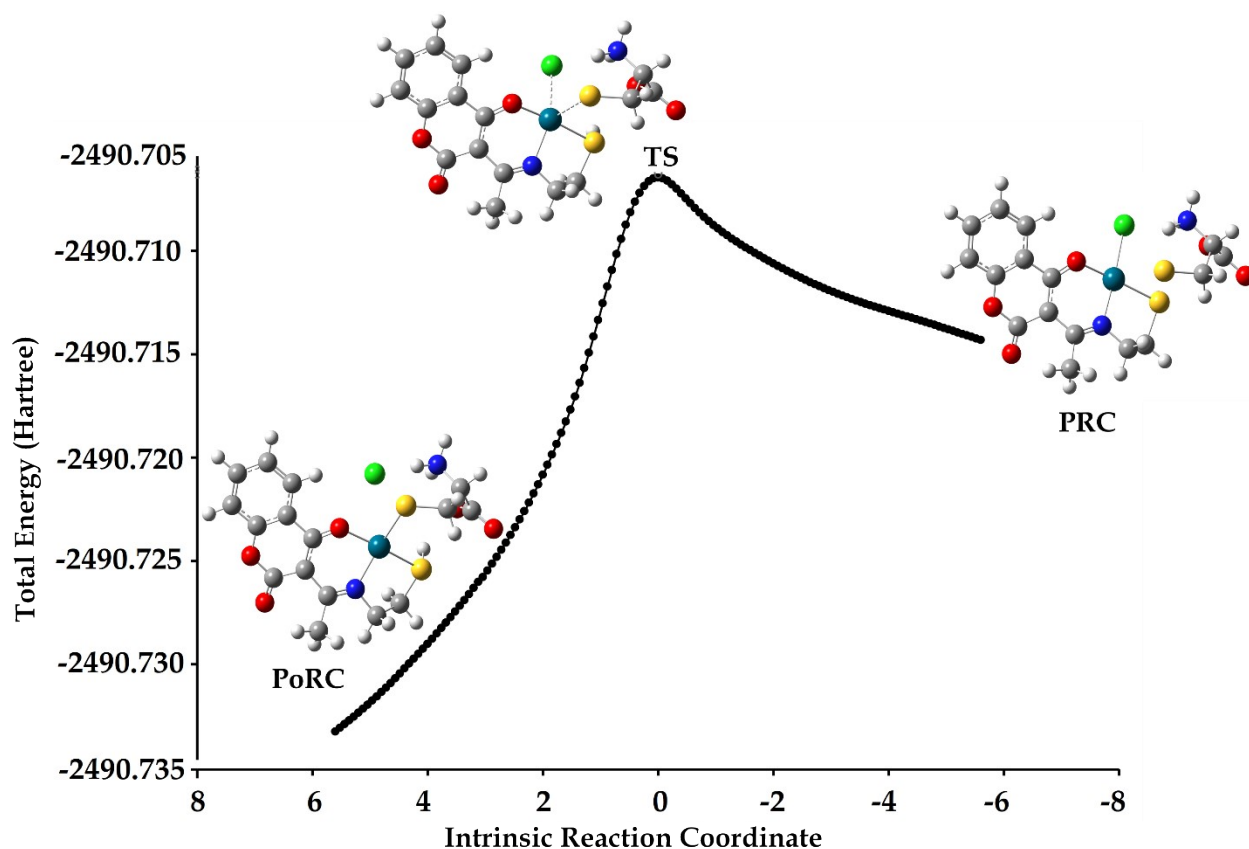

**Figure S9.** Intrinsic Reaction Coordinate (IRC) diagrams connecting the  $\text{C2-S-Cys}^-$  transition state (TS) with two minima: *pre*-reaction (PRC) and *post*-reaction (PoRC) complexes on the singlet potential energy surface obtained with M06-2X functional in conjunction with 6-311++G(d,p) basis set C, N, O, Cl, and H/def2-TZVPD, triple-zeta-valence, basis set for atom Pd. Legend: grey – carbon atom, white – hydrogen atom, red – oxygen atom, blue – nitrogen atom, yellow – sulfur.

**Table S6.** Summed total energies ( $G$  (Hartree)) of reaction participants (local minima and maxima) obtained from IRC calculations

| Acid-base species  | <b>C1</b> (Total energy, $G$ (Hartree)) |              |              |
|--------------------|-----------------------------------------|--------------|--------------|
|                    | PRC                                     | TS           | PoRC         |
| O–Cys              | -2207.523801                            | -2207.506403 | -2207.519360 |
| HS–Cys             | -2207.510977                            | -2207.493530 | -2207.501181 |
| O–Cys <sup>−</sup> | -2207.062323                            | -2207.044306 | -2207.058538 |
| S–Cys <sup>−</sup> | -2207.071232                            | -2207.055804 | -2207.080959 |
| Acid-base species  | <b>C2</b> (Total energy, $G$ (Hartree)) |              |              |
|                    | PRC                                     | TS           | PoRC         |
| O–Cys              | -2491.181094                            | -2491.164646 | -2491.182575 |
| HS–Cys             | -2491.173520                            | -2491.157053 | -2491.165609 |
| O–Cys <sup>−</sup> | -2490.717309                            | -2490.700565 | -2490.720320 |
| S–Cys <sup>−</sup> | -2490.714322                            | -2490.706464 | -2490.733251 |

**Table S7.** The bond length of the interest, the Wiberg bond indices (WBIs), natural atomic charges (NACs), total natural populations (TNPs, in parentheses), and natural electron (NECs) of selected atoms/ions for transition states (TS) of **C1** compound

| <b>O–Cys</b> |            |              |            |            | <b>HS–Cys</b> |            |              |            |            |
|--------------|------------|--------------|------------|------------|---------------|------------|--------------|------------|------------|
| <b>Bond</b>  | <b>WBI</b> | <b>Atoms</b> | <b>NAC</b> | <b>TNP</b> | <b>Bond</b>   | <b>WBI</b> | <b>Atoms</b> | <b>NAC</b> | <b>TNP</b> |

|                                 |                                                                                                                |                              |            |            |                                                                                                                |            |                              |            |            |
|---------------------------------|----------------------------------------------------------------------------------------------------------------|------------------------------|------------|------------|----------------------------------------------------------------------------------------------------------------|------------|------------------------------|------------|------------|
| Pd-O <sub>3</sub>               | 0.4613                                                                                                         | Pd                           | 0.826      | 45.174     | Pd-O <sub>3</sub>                                                                                              | 0.4578     | Pd                           | 0.803      | 45.192     |
| Pd-O <sub>4</sub> <sup>''</sup> | 0.3345                                                                                                         | O <sub>3</sub>               | -0.641     | 8.641      | Pd-O <sub>4</sub> <sup>''</sup>                                                                                | 0.2887     | O <sub>3</sub>               | -0.647     | 8.647      |
| Pd-N <sub>1</sub> <sup>''</sup> | 0.5552                                                                                                         | O <sub>4</sub> <sup>''</sup> | -0.745     | 8.745      | Pd-N <sub>1</sub> <sup>''</sup>                                                                                | 0.5581     | O <sub>4</sub> <sup>''</sup> | -0.723     | 8.723      |
| Pd-Cl <sub>1</sub>              | 0.2160                                                                                                         | N <sub>1</sub> <sup>''</sup> | -0.479     | 7.470      | Pd-Cl <sub>1</sub>                                                                                             | 0.1922     | N <sub>1</sub> <sup>''</sup> | -0.476     | 7.476      |
|                                 |                                                                                                                | Cl <sub>1</sub>              | -0.805     | 17.805     |                                                                                                                |            | Cl <sub>1</sub>              | -0.812     | 17.812     |
| Pd-O <sub>Cys</sub>             | 0.1794                                                                                                         | O <sub>Cys</sub>             | -0.768     | 8.768      | Pd-S <sub>Cys</sub>                                                                                            | 0.2481     | S <sub>Cys</sub>             | 0.029      | 15.971     |
| NEC                             | Pd[core]5s <sup>0.25</sup> 4d <sup>8.63</sup> 5p <sup>0.29</sup> 5d <sup>0.01</sup>                            |                              |            |            | Pd[core]5s <sup>0.25</sup> 4d <sup>8.67</sup> 5p <sup>0.27</sup> 5d <sup>0.01</sup>                            |            |                              |            |            |
|                                 | O <sub>3</sub> [core]2s <sup>1.64</sup> 2p <sup>4.97</sup> 3p <sup>0.01</sup>                                  |                              |            |            | O <sub>3</sub> [core]2s <sup>1.65</sup> 2p <sup>4.98</sup> 3p <sup>0.01</sup> 4p <sup>0.01</sup>               |            |                              |            |            |
|                                 | O <sub>4</sub> <sup>''</sup> [core]2s <sup>1.63</sup> 2p <sup>5.10</sup> 4p <sup>0.01</sup>                    |                              |            |            | O <sub>4</sub> <sup>''</sup> [core]2s <sup>1.66</sup> 2p <sup>5.05</sup> 3p <sup>0.01</sup> 4p <sup>0.01</sup> |            |                              |            |            |
|                                 | N <sub>1</sub> <sup>''</sup> [core]2s <sup>1.29</sup> 2p <sup>4.15</sup> 3p <sup>0.01</sup> 4p <sup>0.01</sup> |                              |            |            | N <sub>1</sub> <sup>''</sup> [core]2s <sup>1.29</sup> 2p <sup>4.16</sup> 3p <sup>0.01</sup> 4p <sup>0.01</sup> |            |                              |            |            |
|                                 | Cl <sub>1</sub> [core]3s <sup>1.96</sup> 3p <sup>5.85</sup>                                                    |                              |            |            | Cl <sub>1</sub> [core]3s <sup>1.96</sup> 3p <sup>5.85</sup>                                                    |            |                              |            |            |
|                                 | O <sub>Cys</sub> [core]2s <sup>1.69</sup> 2p <sup>5.06</sup> 3p <sup>0.01</sup>                                |                              |            |            | S <sub>Cys</sub> [core]3s <sup>1.68</sup> 3p <sup>4.26</sup> 3d <sup>0.02</sup>                                |            |                              |            |            |
| <b>O-Cys<sup>-</sup></b>        |                                                                                                                |                              |            |            | <b>S-Cys<sup>-</sup></b>                                                                                       |            |                              |            |            |
| <b>Bond</b>                     | <b>WBI</b>                                                                                                     | <b>Atoms</b>                 | <b>NAC</b> | <b>TNP</b> | <b>Bond</b>                                                                                                    | <b>WBI</b> | <b>Atoms</b>                 | <b>NAC</b> | <b>TNP</b> |
| Pd-O <sub>3</sub>               | 0.4539                                                                                                         | Pd                           | 0.821      | 45.179     | Pd-O <sub>3</sub>                                                                                              | 0.4630     | Pd                           | 0.712      | 45.288     |
| Pd-O <sub>4</sub> <sup>''</sup> | 0.3539                                                                                                         | O <sub>3</sub>               | -0.642     | 8.643      | Pd-O <sub>4</sub> <sup>''</sup>                                                                                | 0.3522     | O <sub>3</sub>               | -0.632     | 8.632      |
| Pd-N <sub>1</sub> <sup>''</sup> | 0.5481                                                                                                         | O <sub>4</sub> <sup>''</sup> | -0.749     | 8.749      | Pd-N <sub>1</sub> <sup>''</sup>                                                                                | 0.4931     | O <sub>4</sub> <sup>''</sup> | -0.772     | 7.489      |
| Pd-Cl <sub>1</sub>              | 0.2173                                                                                                         | N <sub>1</sub> <sup>''</sup> | 0.472      | 7.472      | Pd-Cl <sub>1</sub>                                                                                             | 0.3341     | N <sub>1</sub> <sup>''</sup> | -0.489     | 8.773      |
|                                 |                                                                                                                | Cl <sub>1</sub>              | -0.817     | 17.817     |                                                                                                                |            | Cl <sub>1</sub>              | -0.782     | 17.782     |
| Pd-O <sub>Cys</sub>             | 0.1892                                                                                                         | O <sub>Cys</sub>             | -0.749     | 8.775      | Pd-S <sub>Cys</sub>                                                                                            | 0.2997     | S <sub>Cys</sub>             | -0.539     | 16.539     |
| NEC                             | Pd[core]5s <sup>0.25</sup> 4d <sup>8.63</sup> 5p <sup>0.29</sup> 5d <sup>0.01</sup>                            |                              |            |            | Pd[core]5s <sup>0.26</sup> 4d <sup>8.64</sup> 5p <sup>0.37</sup> 5d <sup>0.01</sup>                            |            |                              |            |            |
|                                 | O <sub>3</sub> [core]2s <sup>1.64</sup> 2p <sup>4.98</sup> 3p <sup>0.01</sup>                                  |                              |            |            | O <sub>3</sub> [core]2s <sup>1.64</sup> 2p <sup>4.97</sup> 3p <sup>0.01</sup> 4p <sup>0.01</sup>               |            |                              |            |            |
|                                 | O <sub>4</sub> <sup>''</sup> [core]2s <sup>1.63</sup> 2p <sup>5.10</sup> 3p <sup>0.01</sup>                    |                              |            |            | O <sub>4</sub> <sup>''</sup> [core]2s <sup>1.62</sup> 2p <sup>5.13</sup> 3p <sup>0.01</sup> 4p <sup>0.01</sup> |            |                              |            |            |
|                                 | N <sub>1</sub> <sup>''</sup> [core]2s <sup>1.29</sup> 2p <sup>4.16</sup> 4p <sup>0.01</sup>                    |                              |            |            | N <sub>1</sub> <sup>''</sup> [core]2s <sup>1.30</sup> 2p <sup>4.17</sup> 3p <sup>0.01</sup> 4p <sup>0.01</sup> |            |                              |            |            |
|                                 | Cl <sub>1</sub> [core]3s <sup>1.96</sup> 3p <sup>5.85</sup>                                                    |                              |            |            | Cl <sub>1</sub> [core]3s <sup>1.94</sup> 3p <sup>5.84</sup>                                                    |            |                              |            |            |
|                                 | O <sub>Cys</sub> [core]2s <sup>1.69</sup> 2p <sup>5.06</sup> 3p <sup>0.01</sup>                                |                              |            |            | S <sub>Cys</sub> [core]3s <sup>1.78</sup> 3p <sup>4.73</sup> 3d <sup>0.01</sup>                                |            |                              |            |            |

**Table S8.** The bond length of the interest, the Wiberg bond indices (WBIs), natural atomic charges (NACs), total natural populations (TNPs, in parentheses), and natural electron (NECs) of selected atoms/ions for transition states (TS) of C2 compound

| <b>O-Cys</b>      |            |              |            |            | <b>HS-Cys</b>     |            |              |            |            |
|-------------------|------------|--------------|------------|------------|-------------------|------------|--------------|------------|------------|
| <b>Bond</b>       | <b>WBI</b> | <b>Atoms</b> | <b>NAC</b> | <b>TNP</b> | <b>Bond</b>       | <b>WBI</b> | <b>Atoms</b> | <b>NAC</b> | <b>TNP</b> |
| Pd-O <sub>3</sub> | 0.4225     | Pd           | 0.587      | 45.413     | Pd-O <sub>3</sub> | 0.4262     | Pd           | 0.514      | 45.486     |

|                                 |                                                                                                                 |                              |            |            |                                                                                                                |            |                              |            |            |
|---------------------------------|-----------------------------------------------------------------------------------------------------------------|------------------------------|------------|------------|----------------------------------------------------------------------------------------------------------------|------------|------------------------------|------------|------------|
| Pd-S <sub>4</sub> <sup>2-</sup> | 0.6194                                                                                                          | O <sub>3</sub>               | -0.642     | 8.642      | Pd-S <sub>4</sub> <sup>2-</sup>                                                                                | 0.6053     | O <sub>3</sub>               | -0.648     | 8.648      |
| Pd-N <sub>1</sub> <sup>2-</sup> | 0.5156                                                                                                          | S <sub>4</sub> <sup>2-</sup> | 0.267      | 15.733     | Pd-N <sub>1</sub> <sup>2-</sup>                                                                                | 0.5142     | S <sub>4</sub> <sup>2-</sup> | 0.257      | 15.743     |
| Pd-Cl <sub>1</sub>              | 0.2808                                                                                                          | N <sub>1</sub> <sup>2-</sup> | -0.476     | 7.476      | Pd-Cl <sub>1</sub>                                                                                             | 0.2640     | N <sub>1</sub> <sup>2-</sup> | -0.480     | 7.480      |
|                                 |                                                                                                                 | Cl <sub>1</sub>              | -0.768     | 17.768     |                                                                                                                |            | Cl <sub>1</sub>              | -0.772     | 17.772     |
| Pd-O <sub>Cys</sub>             | 0.1776                                                                                                          | O <sub>Cys</sub>             | -0.794     | 8.794      | Pd-S <sub>Cys</sub>                                                                                            | 0.2976     | S <sub>Cys</sub>             | 0.055      | 15.945     |
| NEC                             | Pd[core]5s <sup>0.274</sup> 4d <sup>8.76</sup> 5p <sup>0.37</sup> 5d <sup>0.01</sup>                            |                              |            |            | Pd[core]5s <sup>0.294</sup> 4d <sup>8.79</sup> 5p <sup>0.40</sup> 5d <sup>0.01</sup>                           |            |                              |            |            |
|                                 | O <sub>3</sub> [core]2s <sup>1.64</sup> 2p <sup>4.98</sup> 3p <sup>0.01</sup>                                   |                              |            |            | O <sub>3</sub> [core]2s <sup>1.64</sup> 2p <sup>4.98</sup> 3p <sup>0.01</sup> 4p <sup>0.01</sup>               |            |                              |            |            |
|                                 | S <sub>4</sub> <sup>2-</sup> [core]3s <sup>1.65</sup> 3p <sup>4.05</sup> 3d <sup>0.02</sup>                     |                              |            |            | S <sub>4</sub> <sup>2-</sup> [core] 3s <sup>1.65</sup> 3p <sup>4.06</sup> 3d <sup>0.02</sup>                   |            |                              |            |            |
|                                 | N <sub>1</sub> <sup>2-</sup> [core]2s <sup>1.30</sup> 2p <sup>4.15</sup> 3p <sup>0.01</sup> 4p <sup>0.01</sup>  |                              |            |            | N <sub>1</sub> <sup>2-</sup> [core]2s <sup>1.30</sup> 2p <sup>4.15</sup> 3p <sup>0.01</sup> 4p <sup>0.01</sup> |            |                              |            |            |
|                                 | Cl <sub>1</sub> [core]3s <sup>1.95</sup> 3p <sup>5.82</sup>                                                     |                              |            |            | Cl <sub>1</sub> [core]3s <sup>1.94</sup> 3p <sup>5.83</sup>                                                    |            |                              |            |            |
|                                 | O <sub>Cys</sub> [core]2s <sup>1.70</sup> 2p <sup>5.08</sup> 3p <sup>0.01</sup>                                 |                              |            |            | S <sub>Cys</sub> [core]3s <sup>1.67</sup> 3p <sup>4.24</sup> 3d <sup>0.02</sup>                                |            |                              |            |            |
| <b>O-Cys<sup>-</sup></b>        |                                                                                                                 |                              |            |            | <b>S-Cys<sup>-</sup></b>                                                                                       |            |                              |            |            |
| <b>Bond</b>                     | <b>WBI</b>                                                                                                      | <b>Atoms</b>                 | <b>NAC</b> | <b>TNP</b> | <b>Bond</b>                                                                                                    | <b>WBI</b> | <b>Atoms</b>                 | <b>NAC</b> | <b>TNP</b> |
| Pd-O <sub>3</sub>               | 0.4216                                                                                                          | Pd                           | 0.575      | 45.425     | Pd-O <sub>3</sub>                                                                                              | 0.4195     | Pd                           | 0.436      | 45.564     |
| Pd-S <sub>4</sub> <sup>2-</sup> | 0.6257                                                                                                          | O <sub>3</sub>               | -0.641     | 8.641      | Pd-S <sub>4</sub> <sup>2-</sup>                                                                                | 0.6415     | O <sub>3</sub>               | -0.639     | 8.639      |
| Pd-N <sub>1</sub> <sup>2-</sup> | 0.5079                                                                                                          | S <sub>4</sub> <sup>2-</sup> | 0.280      | 15.720     | Pd-N <sub>1</sub> <sup>2-</sup>                                                                                | 0.4623     | S <sub>4</sub> <sup>2-</sup> | 0.273      | 15.727     |
| Pd-Cl <sub>1</sub>              | 0.3013                                                                                                          | N <sub>1</sub> <sup>2-</sup> | -0.479     | 7.479      | Pd-Cl <sub>1</sub>                                                                                             | 0.3911     | N <sub>1</sub> <sup>2-</sup> | -0.489     | 7.489      |
|                                 |                                                                                                                 | Cl <sub>1</sub>              | -0.764     | 17.764     |                                                                                                                |            | Cl <sub>1</sub>              | -0.743     | 17.743     |
| Pd-O <sub>Cys</sub>             | 0.1800                                                                                                          | O <sub>Cys</sub>             | -0.813     | 8.813      | Pd-S <sub>Cys</sub>                                                                                            | 0.3323     | S <sub>Cys</sub>             | -0.526     | 16.526     |
| NEC                             | Pd[core]5s <sup>0.274</sup> 4d <sup>8.76</sup> 5p <sup>0.38</sup> 5d <sup>0.01</sup>                            |                              |            |            | Pd[core]5s <sup>0.294</sup> 4d <sup>8.79</sup> 5p <sup>0.47</sup> 5d <sup>0.01</sup>                           |            |                              |            |            |
|                                 | O <sub>3</sub> [core]2s <sup>1.64</sup> 2p <sup>4.98</sup> 3p <sup>0.01</sup>                                   |                              |            |            | O <sub>3</sub> [core]2s <sup>1.64</sup> 2p <sup>4.98</sup> 3p <sup>0.01</sup>                                  |            |                              |            |            |
|                                 | S <sub>4</sub> <sup>2-</sup> [core] 3s <sup>1.65</sup> 3p <sup>4.03</sup> 3p <sup>0.01</sup> 3d <sup>0.01</sup> |                              |            |            | S <sub>4</sub> <sup>2-</sup> [core] 3s <sup>1.64</sup> 3p <sup>4.05</sup> 3d <sup>0.02</sup>                   |            |                              |            |            |
|                                 | N <sub>1</sub> <sup>2-</sup> [core]2s <sup>1.30</sup> 2p <sup>4.15</sup> 3p <sup>0.01</sup>                     |                              |            |            | N <sub>1</sub> <sup>2-</sup> [core]2s <sup>1.30</sup> 2p <sup>4.16</sup> 3p <sup>0.01</sup> 4p <sup>0.01</sup> |            |                              |            |            |
|                                 | Cl <sub>1</sub> [core]3s <sup>1.94</sup> 3p <sup>5.82</sup>                                                     |                              |            |            | Cl <sub>1</sub> [core]3s <sup>1.93</sup> 3p <sup>5.81</sup>                                                    |            |                              |            |            |
|                                 | O <sub>Cys</sub> [core]2s <sup>1.70</sup> 2p <sup>5.09</sup> 3p <sup>0.01</sup>                                 |                              |            |            | S <sub>Cys</sub> [core]3s <sup>1.77</sup> 3p <sup>4.72</sup> 3d <sup>0.01</sup>                                |            |                              |            |            |

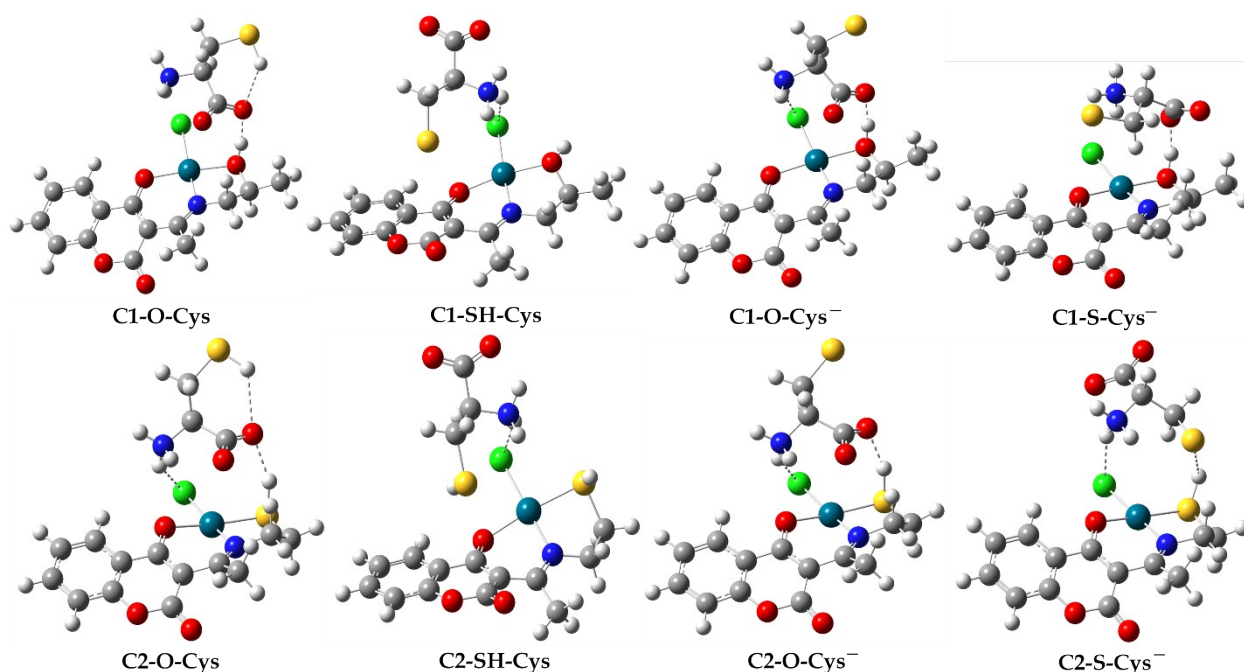

**Figure S10.** Optimized geometries of *pre*-reaction (PRC) complexes between the investigated compounds, **C1** and **C2**, and acid-base forms of **L-Cys/L-Cys<sup>-</sup>** with intramolecular hydrogen bond (interrupted line) obtained with M06-2X functional in conjunction with 6-311++G(d,p) basis set C, N, O, Cl, and H/def2-TZVPD, triple-zeta-valence, basis set for atom Pd theory in the water. Legend: grey – carbon atom, white – hydrogen atom, red – oxygen atom, blue – nitrogen atom, yellow – sulfur.



**Table S9.** The bond length of the interest, the Wiberg bond indices (WBIs), natural atomic charges (NACs), total natural populations (TNPs, in parentheses), and natural electron (NECs) of selected atoms/ions for *pre*-reaction complexes (PRC) of C1 compound

| O-Cys               |                                                                                     |                  |        |        | HS-Cys                                                                                             |        |                  |        |        |
|---------------------|-------------------------------------------------------------------------------------|------------------|--------|--------|----------------------------------------------------------------------------------------------------|--------|------------------|--------|--------|
| Bond                | WBI                                                                                 | Atoms            | NAC    | TNP    | Bond                                                                                               | WBI    | Atoms            | NAC    | TNP    |
| Pd-O <sub>3</sub>   | 0.4349                                                                              | Pd               | 0.742  | 45.258 | Pd-O <sub>3</sub>                                                                                  | 0.4400 | Pd               | 0.744  | 45.256 |
| Pd-O <sub>4''</sub> | 0.3381                                                                              | O <sub>3</sub>   | -0.648 | 8.648  | Pd-O <sub>4''</sub>                                                                                | 0.2928 | O <sub>3</sub>   | -0.678 | 8.678  |
| Pd-N <sub>1''</sub> | 0.5295                                                                              | O <sub>4''</sub> | -0.752 | 8.752  | Pd-N <sub>1''</sub>                                                                                | 0.5267 | O <sub>4''</sub> | -0.718 | 8.718  |
| Pd-Cl <sub>1</sub>  | 0.5000                                                                              | N <sub>1''</sub> | -0.477 | 7.477  | Pd-Cl <sub>1</sub>                                                                                 | 0.5204 | N <sub>1''</sub> | -0.482 | 7.482  |
|                     |                                                                                     | Cl <sub>1</sub>  | -0.631 | 17.631 |                                                                                                    |        | Cl <sub>1</sub>  | -0.628 | 17.628 |
| Pd-O <sub>Cys</sub> | 0.0319                                                                              | O <sub>Cys</sub> | -0.755 | 8.755  | Pd-S <sub>Cys</sub>                                                                                | 0.0390 | S <sub>Cys</sub> | -0.054 | 16.054 |
| NEC                 | Pd[core]5s <sup>0.29</sup> 4d <sup>8.68</sup> 5p <sup>0.27</sup> 5d <sup>0.01</sup> |                  |        |        | Pd[core]5s <sup>0.29</sup> 4d <sup>8.86</sup> 5p <sup>0.27</sup> 5d <sup>0.01</sup>                |        |                  |        |        |
|                     | O <sub>3</sub> [core]2s <sup>1.64</sup> 2p <sup>4.98</sup> 3p <sup>0.01</sup>       |                  |        |        | O <sub>3</sub> [core]2s <sup>1.65</sup> 2p <sup>4.99</sup> 3p <sup>0.01</sup> 4p <sup>0.01</sup>   |        |                  |        |        |
|                     | O <sub>4''</sub> [core]2s <sup>1.64</sup> 2p <sup>5.09</sup> 3p <sup>0.01</sup>     |                  |        |        | O <sub>4''</sub> [core]2s <sup>1.65</sup> 2p <sup>5.05</sup> 3p <sup>0.01</sup>                    |        |                  |        |        |
|                     | N <sub>1''</sub> [core]2s <sup>1.29</sup> 2p <sup>4.16</sup> 3p <sup>0.01</sup>     |                  |        |        | N <sub>1''</sub> [core]2s <sup>1.29</sup> 2p <sup>4.16</sup> 3p <sup>0.01</sup> 4p <sup>0.01</sup> |        |                  |        |        |
|                     | Cl <sub>1</sub> [core]3s <sup>1.92</sup> 3p <sup>5.71</sup>                         |                  |        |        | Cl <sub>1</sub> [core]3s <sup>1.92</sup> 3p <sup>5.71</sup>                                        |        |                  |        |        |
|                     | O <sub>Cys</sub> [core]2s <sup>1.71</sup> 2p <sup>5.03</sup> 3p <sup>0.01</sup>     |                  |        |        | S <sub>Cys</sub> [core]3s <sup>1.70</sup> 3p <sup>4.32</sup> 3d <sup>0.01</sup>                    |        |                  |        |        |
| O-Cys <sup>-</sup>  |                                                                                     |                  |        |        | S-Cys <sup>-</sup>                                                                                 |        |                  |        |        |
| Bond                | WBI                                                                                 | Atoms            | NAC    | TNP    | Bond                                                                                               | WBI    | Atoms            | NAC    | TNP    |
| Pd-O <sub>3</sub>   | 0.4294                                                                              | Pd               | 0.738  | 45.261 | Pd-O <sub>3</sub>                                                                                  | 0.4288 | Pd               | 0.733  | 45.267 |
| Pd-O <sub>4''</sub> | 0.3470                                                                              | O <sub>3</sub>   | -0.650 | 8.650  | Pd-O <sub>4''</sub>                                                                                | 0.3357 | O <sub>3</sub>   | -0.648 | 8.648  |
| Pd-N <sub>1''</sub> | 0.5255                                                                              | O <sub>4''</sub> | -0.756 | 8.756  | Pd-N <sub>1''</sub>                                                                                | 0.5059 | O <sub>4''</sub> | -0.749 | 8.748  |
| Pd-Cl <sub>1</sub>  | 0.5068                                                                              | N <sub>1''</sub> | -0.476 | 7.476  | Pd-Cl <sub>1</sub>                                                                                 | 0.5290 | N <sub>1''</sub> | -0.496 | 7.496  |
|                     |                                                                                     | Cl <sub>1</sub>  | -0.626 | 17.626 |                                                                                                    |        | Cl <sub>1</sub>  | -0.627 | 17.627 |
| Pd-O <sub>Cys</sub> | 0.0279                                                                              | O <sub>Cys</sub> | -0.770 | 8.770  | Pd-S <sub>Cys</sub>                                                                                | 0.0112 | S <sub>Cys</sub> | -0.721 | 16.721 |
| NEC                 | Pd[core]5s <sup>0.30</sup> 4d <sup>8.88</sup> 5p <sup>0.27</sup> 5d <sup>0.01</sup> |                  |        |        | Pd[core]5s <sup>0.30</sup> 4d <sup>8.68</sup> 5p <sup>0.27</sup> 5d <sup>0.01</sup>                |        |                  |        |        |
|                     | O <sub>3</sub> [core]2s <sup>1.64</sup> 2p <sup>4.98</sup> 3p <sup>0.01</sup>       |                  |        |        | O <sub>3</sub> [core]2s <sup>1.64</sup> 2p <sup>4.98</sup> 3p <sup>0.01</sup>                      |        |                  |        |        |
|                     | O <sub>4''</sub> [core]2s <sup>1.64</sup> 2p <sup>5.10</sup> 3p <sup>0.01</sup>     |                  |        |        | O <sub>4''</sub> [core]2s <sup>1.64</sup> 2p <sup>5.09</sup> 3p <sup>0.01</sup>                    |        |                  |        |        |
|                     | N <sub>1''</sub> [core]2s <sup>1.29</sup> 2p <sup>4.16</sup> 3p <sup>0.01</sup>     |                  |        |        | N <sub>1''</sub> [core]2s <sup>1.29</sup> 2p <sup>4.17</sup> 3p <sup>0.01</sup> 4p <sup>0.01</sup> |        |                  |        |        |
|                     | Cl <sub>1</sub> [core]3s <sup>1.92</sup> 3p <sup>5.71</sup>                         |                  |        |        | Cl <sub>1</sub> [core]3s <sup>1.91</sup> 3p <sup>5.71</sup>                                        |        |                  |        |        |
|                     | O <sub>Cys</sub> [core]2s <sup>1.71</sup> 2p <sup>5.03</sup> 3p <sup>0.01</sup>     |                  |        |        | S <sub>Cys</sub> [core]3s <sup>1.82</sup> 3p <sup>4.87</sup> 3d <sup>0.01</sup>                    |        |                  |        |        |

**Table S10.** The bond length of the interest, the Wiberg bond indices (WBIs), natural atomic charges (NACs), total natural populations (TNPs, in parentheses), and natural electron (NECs) of selected atoms/ions for *pre*-reaction complexes (PRC) of C2 compound

| O-Cys                           |                                                                                             |                              |        |        | HS-Cys                                                                                                         |        |                              |        |         |
|---------------------------------|---------------------------------------------------------------------------------------------|------------------------------|--------|--------|----------------------------------------------------------------------------------------------------------------|--------|------------------------------|--------|---------|
| Bond                            | WBI                                                                                         | Atoms                        | NAC    | TNP    | Bond                                                                                                           | WBI    | Atoms                        | NAC    | TNP     |
| Pd-O <sub>3</sub>               | 0.3731                                                                                      | Pd                           | 0.486  | 45.514 | Pd-O <sub>3</sub>                                                                                              | 0.3831 | Pd                           | 0.519  | 45.481  |
| Pd-S <sub>4</sub> <sup>••</sup> | 0.6175                                                                                      | O <sub>3</sub>               | -0.690 | 8.690  | Pd- S <sub>4</sub> <sup>••</sup>                                                                               | 0.5947 | O <sub>3</sub>               | -0.692 | 8.692   |
| Pd-N <sub>1</sub> <sup>••</sup> | 0.4938                                                                                      | S <sub>4</sub> <sup>••</sup> | 0.216  | 15.784 | Pd-N <sub>1</sub> <sup>••</sup>                                                                                | 0.5002 | S <sub>4</sub> <sup>••</sup> | 0.252  | 16.056  |
| Pd-Cl <sub>1</sub>              | 0.5563                                                                                      | N <sub>1</sub> <sup>••</sup> | -0.471 | 7.471  | Pd-Cl <sub>1</sub>                                                                                             | 0.5405 | N <sub>1</sub> <sup>••</sup> | -0.485 | 7.484   |
|                                 |                                                                                             | Cl <sub>1</sub>              | -0.587 | 17.587 |                                                                                                                |        | Cl <sub>1</sub>              | -0.594 | 17.594  |
| Pd-O <sub>Cys</sub>             | 0.0373                                                                                      | O <sub>Cys</sub>             | -0.780 | 8.780  | Pd-S <sub>Cys</sub>                                                                                            | 0.0416 | S <sub>Cys</sub>             | -0.056 | 16.056  |
| NEC                             | Pd[core]5s <sup>0.33</sup> 4d <sup>8.83</sup> 5p <sup>0.34</sup> 5d <sup>0.01</sup>         |                              |        |        | Pd[core]5s <sup>0.33</sup> 4d <sup>8.81</sup> 5p <sup>0.33</sup> 5d <sup>0.01</sup>                            |        |                              |        |         |
|                                 | O <sub>3</sub> [core]2s <sup>1.65</sup> 2p <sup>5.01</sup> 3p <sup>0.01</sup>               |                              |        |        | O <sub>3</sub> [core]2s <sup>1.65</sup> 2p <sup>5.00</sup> 3p <sup>0.01</sup> 4p <sup>0.01</sup>               |        |                              |        |         |
|                                 | S <sub>4</sub> <sup>••</sup> [core]3s <sup>1.71</sup> 3p <sup>4.31</sup> 3d <sup>0.01</sup> |                              |        |        | S <sub>4</sub> <sup>••</sup> [core]3s <sup>1.65</sup> 3p <sup>4.06</sup> 3d <sup>0.02</sup>                    |        |                              |        |         |
|                                 | N <sub>1</sub> <sup>••</sup> [core]2s <sup>1.30</sup> 2p <sup>4.15</sup> 3p <sup>0.01</sup> |                              |        |        | N <sub>1</sub> <sup>••</sup> [core]2s <sup>1.30</sup> 2p <sup>4.16</sup> 3p <sup>0.01</sup> 4p <sup>0.01</sup> |        |                              |        |         |
|                                 | Cl <sub>1</sub> [core]3s <sup>1.90</sup> 3p <sup>5.68</sup>                                 |                              |        |        | Cl <sub>1</sub> [core]3s <sup>1.91</sup> 3p <sup>5.68</sup>                                                    |        |                              |        |         |
|                                 | O <sub>Cys</sub> [core]2s <sup>1.71</sup> 2p <sup>5.05</sup> 3p <sup>0.01</sup>             |                              |        |        | S <sub>Cys</sub> [core]3s <sup>1.70</sup> 3p <sup>4.32</sup> 3d <sup>0.01</sup>                                |        |                              |        |         |
| O-Cys <sup>-</sup>              |                                                                                             |                              |        |        | S-Cys <sup>-</sup>                                                                                             |        |                              |        |         |
| Bond                            | WBI                                                                                         | Atoms                        | NAC    | TNP    | Bond                                                                                                           | WBI    | Atoms                        | NAC    | TNP     |
| Pd-O <sub>3</sub>               | 0.3671                                                                                      | Pd                           | 0.484  | 45.516 | Pd-O <sub>3</sub>                                                                                              | 0.3789 | Pd                           | 0.503  | 45.497  |
| Pd-S <sub>4</sub> <sup>••</sup> | 0.6284                                                                                      | O <sub>3</sub>               | -0.689 | 8.689  | Pd- S <sub>4</sub> <sup>••</sup>                                                                               | 0.6007 | O <sub>3</sub>               | -0.662 | 8.661   |
| Pd-N <sub>1</sub> <sup>••</sup> | 0.4917                                                                                      | S <sub>4</sub> <sup>••</sup> | 0.193  | 15.807 | Pd-N <sub>1</sub> <sup>••</sup>                                                                                | 0.4864 | S <sub>4</sub> <sup>••</sup> | 0.251  | 15.749  |
| Pd-Cl <sub>1</sub>              | 0.5489                                                                                      | N <sub>1</sub> <sup>••</sup> | -0.469 | 7.469  | Pd-Cl <sub>1</sub>                                                                                             | 0.5453 | N <sub>1</sub> <sup>••</sup> | -0.483 | 7.483   |
|                                 |                                                                                             | Cl <sub>1</sub>              | -0.589 | 17.589 |                                                                                                                |        | Cl <sub>1</sub>              | -0.592 | 17.592  |
| Pd-O <sub>Cys</sub>             | 0.0354                                                                                      | O <sub>Cys</sub>             | -0.793 | 8.793  | Pd-S <sub>Cys</sub>                                                                                            | 0.0669 | S <sub>Cys</sub>             | -0.707 | 16.7070 |
| NEC                             | Pd[core]5s <sup>0.33</sup> 4d <sup>8.83</sup> 5p <sup>0.34</sup> 5d <sup>0.01</sup>         |                              |        |        | Pd[core]5s <sup>0.33</sup> 4d <sup>8.82</sup> 5p <sup>0.34</sup> 5d <sup>0.01</sup>                            |        |                              |        |         |
|                                 | O <sub>3</sub> [core]2s <sup>1.65</sup> 2p <sup>5.02</sup> 3p <sup>0.01</sup>               |                              |        |        | O <sub>3</sub> [core]2s <sup>1.65</sup> 2p <sup>4.99</sup> 3p <sup>0.01</sup>                                  |        |                              |        |         |
|                                 | S <sub>4</sub> <sup>••</sup> [core]3s <sup>1.64</sup> 3p <sup>4.13</sup> 3d <sup>0.02</sup> |                              |        |        | S <sub>4</sub> <sup>••</sup> [core]3s <sup>1.66</sup> 3p <sup>4.06</sup> 3d <sup>0.02</sup>                    |        |                              |        |         |
|                                 | N <sub>1</sub> <sup>••</sup> [core]2s <sup>1.30</sup> 2p <sup>4.14</sup> 3p <sup>0.01</sup> |                              |        |        | N <sub>1</sub> <sup>••</sup> [core]2s <sup>1.30</sup> 2p <sup>4.16</sup> 3p <sup>0.01</sup>                    |        |                              |        |         |
|                                 | Cl <sub>1</sub> [core]3s <sup>1.90</sup> 3p <sup>5.68</sup>                                 |                              |        |        | Cl <sub>1</sub> [core]3s <sup>1.90</sup> 3p <sup>5.68</sup>                                                    |        |                              |        |         |
|                                 | O <sub>Cys</sub> [core]2s <sup>1.71</sup> 2p <sup>5.07</sup> 3p <sup>0.01</sup>             |                              |        |        | S <sub>Cys</sub> [core]3s <sup>1.81</sup> 3p <sup>4.87</sup> 3d <sup>0.01</sup>                                |        |                              |        |         |

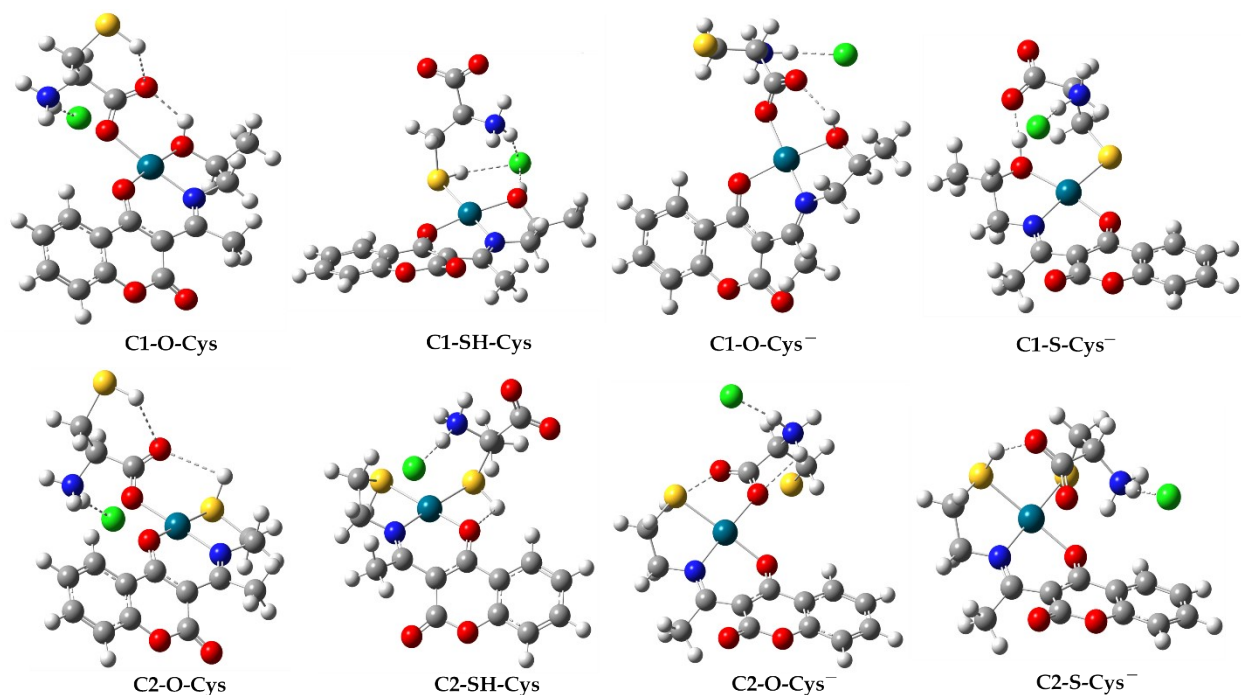

**Figure S11.** Optimized geometries of *post*-reaction (**PoRC**) complexes between the investigated compounds, **C1** and **C2**, and acid-base forms of **L-Cys/L-Cys<sup>-</sup>** with intramolecular hydrogen bond (interrupted line) obtained with M06-2X functional in conjunction with 6-311++G(d,p) basis set C, N, O, Cl, and H/def2-TZVPD, triple-zeta-valence, basis set for atom Pd theory in the water. Legend: grey – carbon atom, white – hydrogen atom, red – oxygen atom, blue – nitrogen atom, yellow – sulfur.

**Table S11.** The bond length of the interest, the Wiberg bond indices (WBIs), natural atomic charges (NACs), total natural populations (TNPs, in parentheses), and natural electron (NECs) of selected atoms/ions for *post*-reaction complexes (PoRC) of **C1** compound

| O–Cys                           |                                                                                             |                              |        |        | HS–Cys                                                                                                         |        |                              |        |        |
|---------------------------------|---------------------------------------------------------------------------------------------|------------------------------|--------|--------|----------------------------------------------------------------------------------------------------------------|--------|------------------------------|--------|--------|
| Bond                            | WBI                                                                                         | Atoms                        | NAC    | TNP    | Bond                                                                                                           | WBI    | Atoms                        | NAC    | TNP    |
| Pd-O <sub>3</sub>               | 0.4347                                                                                      | Pd                           | 0.885  | 45.115 | Pd-O <sub>3</sub>                                                                                              | 0.4478 | Pd                           | 0.718  | 45.282 |
| Pd-O <sub>4</sub> <sup>••</sup> | 0.3093                                                                                      | O <sub>3</sub>               | -0.652 | 8.652  | Pd- O <sub>4</sub> <sup>••</sup>                                                                               | 0.3220 | O <sub>3</sub>               | -0.645 | 8.645  |
| Pd-N <sub>1</sub> <sup>••</sup> | 0.5424                                                                                      | O <sub>4</sub> <sup>••</sup> | -0.733 | 8.733  | Pd-N <sub>1</sub> <sup>••</sup>                                                                                | 0.5187 | O <sub>4</sub> <sup>••</sup> | -0.784 | 8.785  |
| Pd-Cl <sub>1</sub>              | 0.0023                                                                                      | N <sub>1</sub> <sup>••</sup> | -0.483 | 7.483  | Pd-Cl <sub>1</sub>                                                                                             | 0.0076 | N <sub>1</sub> <sup>••</sup> | -0.486 | 7.486  |
|                                 |                                                                                             | Cl <sub>1</sub>              | -0.897 | 17.897 |                                                                                                                |        | Cl <sub>1</sub>              | -0.836 | 17.834 |
| Pd-O <sub>Cys</sub>             | 0.3345                                                                                      | O <sub>Cys</sub>             | -0.756 | 8.756  | Pd-S <sub>Cys</sub>                                                                                            | 0.5017 | S <sub>Cys</sub>             | 0.146  | 15.854 |
| NEC                             | Pd[core]5s <sup>0.28</sup> 4d <sup>8.62</sup> 5p <sup>0.20</sup> 5d <sup>0.01</sup>         |                              |        |        | Pd[core]5s <sup>0.31</sup> 4d <sup>8.72</sup> 5p <sup>0.24</sup> 5d <sup>0.01</sup>                            |        |                              |        |        |
|                                 | O <sub>3</sub> [core]2s <sup>1.65</sup> 2p <sup>4.98</sup> 3p <sup>0.01</sup>               |                              |        |        | O <sub>3</sub> [core]2s <sup>1.64</sup> 2p <sup>4.98</sup> 3p <sup>0.01</sup> 4p <sup>0.01</sup>               |        |                              |        |        |
|                                 | O <sub>4</sub> [core]2s <sup>1.64</sup> 2p <sup>5.08</sup> 3p <sup>0.01</sup>               |                              |        |        | O <sub>4</sub> [core]2s <sup>1.65</sup> 2p <sup>5.11</sup> 3p <sup>0.01</sup>                                  |        |                              |        |        |
|                                 | N[core]2s <sup>1.29</sup> 2p <sup>4.17</sup> 3p <sup>0.01</sup>                             |                              |        |        | N[core]2s <sup>1.29</sup> 2p <sup>4.17</sup> 3p <sup>0.01</sup> 4p <sup>0.01</sup>                             |        |                              |        |        |
|                                 | Cl[core]3s <sup>1.98</sup> 3p <sup>5.91</sup>                                               |                              |        |        | Cl[core]3s <sup>1.98</sup> 3p <sup>5.86</sup>                                                                  |        |                              |        |        |
|                                 | O[core]2s <sup>1.68</sup> 2p <sup>5.05</sup> 3p <sup>0.01</sup>                             |                              |        |        | S[core]3s <sup>1.65</sup> 3p <sup>4.17</sup> 3d <sup>0.02</sup>                                                |        |                              |        |        |
| O–Cys <sup>-</sup>              |                                                                                             |                              |        |        | S–Cys <sup>-</sup>                                                                                             |        |                              |        |        |
| Bond                            | WBI                                                                                         | Atoms                        | NAC    | TNP    | Bond                                                                                                           | WBI    | Atoms                        | NAC    | TNP    |
| Pd-O <sub>3</sub>               | 0.4296                                                                                      | Pd                           | 0.880  | 45.120 | Pd-O <sub>3</sub>                                                                                              | 0.4016 | Pd                           | 0.616  | 45.384 |
| Pd-O <sub>4</sub> <sup>••</sup> | 0.3126                                                                                      | O <sub>3</sub>               | -0.653 | 8.653  | Pd- O <sub>4</sub> <sup>••</sup>                                                                               | 0.3205 | O <sub>3</sub>               | -0.662 | 8.662  |
| Pd-N <sub>1</sub> <sup>••</sup> | 0.5357                                                                                      | O <sub>4</sub> <sup>••</sup> | -0.735 | 8.735  | Pd-N <sub>1</sub> <sup>••</sup>                                                                                | 0.4167 | O <sub>4</sub> <sup>••</sup> | -0.777 | 8.777  |
| Pd-Cl <sub>1</sub>              | 0.0016                                                                                      | N <sub>1</sub> <sup>••</sup> | -0.484 | 7.484  | Pd-Cl <sub>1</sub>                                                                                             | 0.0442 | N <sub>1</sub> <sup>••</sup> | -0.503 | 7.503  |
|                                 |                                                                                             | Cl <sub>1</sub>              | -0.910 | 17.910 |                                                                                                                |        | Cl <sub>1</sub>              | -0.923 | 17.923 |
| Pd-O <sub>Cys</sub>             | 0.3482                                                                                      | O <sub>Cys</sub>             | -0.765 | 8.765  | Pd-S <sub>Cys</sub>                                                                                            | 0.7147 | S <sub>Cys</sub>             | -0.261 | 16.261 |
| NEC                             | Pd[core]5s <sup>0.28</sup> 4d <sup>8.62</sup> 5p <sup>0.20</sup> 5d <sup>0.01</sup>         |                              |        |        | Pd[core]5s <sup>0.32</sup> 4d <sup>8.76</sup> 5p <sup>0.29</sup> 5d <sup>0.01</sup>                            |        |                              |        |        |
|                                 | O <sub>3</sub> [core]2s <sup>1.65</sup> 2p <sup>4.98</sup> 3p <sup>0.01</sup>               |                              |        |        | O <sub>3</sub> [core]2s <sup>1.64</sup> 2p <sup>5.00</sup> 3p <sup>0.01</sup>                                  |        |                              |        |        |
|                                 | O <sub>4</sub> <sup>••</sup> [core]2s <sup>1.64</sup> 2p <sup>5.08</sup> 3p <sup>0.01</sup> |                              |        |        | O <sub>4</sub> <sup>••</sup> [core]2s <sup>1.64</sup> 2p <sup>5.12</sup> 3p <sup>0.01</sup>                    |        |                              |        |        |
|                                 | N <sub>1</sub> <sup>••</sup> [core]2s <sup>1.29</sup> 2p <sup>4.17</sup> 3p <sup>0.01</sup> |                              |        |        | N <sub>1</sub> <sup>••</sup> [core]2s <sup>1.30</sup> 2p <sup>4.18</sup> 3p <sup>0.01</sup> 4p <sup>0.01</sup> |        |                              |        |        |
|                                 | Cl <sub>1</sub> [core]3s <sup>1.99</sup> 3p <sup>5.92</sup>                                 |                              |        |        | Cl <sub>1</sub> [core]3s <sup>1.98</sup> 3p <sup>5.94</sup>                                                    |        |                              |        |        |
|                                 | O <sub>Cys</sub> [core]2s <sup>1.69</sup> 2p <sup>5.06</sup> 3p <sup>0.01</sup>             |                              |        |        | S <sub>Cys</sub> [core]3s <sup>1.73</sup> 3p <sup>4.50</sup> 3d <sup>0.01</sup>                                |        |                              |        |        |

**Table S12.** The bond length of the interest, the Wiberg bond indices (WBIs), natural atomic charges (NACs), total natural populations (TNPs, in parentheses), and natural electron (NECs) of selected atoms/ions for *post*-reaction complexes (PoRC) of C2 compound

| O–Cys             |        |       |       |        | HS–Cys            |        |       |       |        |
|-------------------|--------|-------|-------|--------|-------------------|--------|-------|-------|--------|
| Bond              | WBI    | Atoms | NAC   | TNP    | Bond              | WBI    | Atoms | NAC   | TNP    |
| Pd-O <sub>3</sub> | 0.3906 | Pd    | 0.672 | 45.328 | Pd-O <sub>3</sub> | 0.3837 | Pd    | 0.491 | 45.509 |

|                                |                                                                                            |                             |            |            |                                                                                                               |            |                             |            |            |
|--------------------------------|--------------------------------------------------------------------------------------------|-----------------------------|------------|------------|---------------------------------------------------------------------------------------------------------------|------------|-----------------------------|------------|------------|
| Pd-S <sub>4</sub> <sup>π</sup> | 0.5954                                                                                     | O <sub>3</sub>              | -0.685     | 8.685      | Pd- S <sub>4</sub> <sup>π</sup>                                                                               | 0.5868     | O <sub>3</sub>              | -0.685     | 8.685      |
| Pd-N <sub>1</sub> <sup>π</sup> | 0.5120                                                                                     | S <sub>4</sub> <sup>π</sup> | 0.244      | 15.756     | Pd-N <sub>1</sub> <sup>π</sup>                                                                                | 0.4752     | S <sub>4</sub> <sup>π</sup> | 0.243      | 15.575     |
| Pd-Cl <sub>1</sub>             | 0.0025                                                                                     | N <sub>1</sub> <sup>π</sup> | -0.487     | 7.487      | Pd-Cl <sub>1</sub>                                                                                            | 0.0400     | N <sub>1</sub> <sup>π</sup> | -0.478     | 7.478      |
|                                |                                                                                            | Cl <sub>1</sub>             | -0.896     | 17.896     |                                                                                                               |            | Cl <sub>1</sub>             | -0.890     | 17.889     |
| Pd-O <sub>Cys</sub>            | 0.3657                                                                                     | O <sub>Cys</sub>            | -0.749     | 8.749      | Pd-S <sub>Cys</sub>                                                                                           | 0.5179     | S <sub>Cys</sub>            | 0.197      | 15.803     |
| NEC                            | Pd[core]5s <sup>0.32</sup> 4d <sup>8.74</sup> 5p <sup>0.26</sup> 5d <sup>0.02</sup>        |                             |            |            | Pd[core]5s <sup>0.34</sup> 4d <sup>8.85</sup> 5p <sup>0.30</sup> 5d <sup>0.01</sup>                           |            |                             |            |            |
|                                | O <sub>3</sub> [core]2s <sup>1.65</sup> 2p <sup>4.99</sup> 3p <sup>0.01</sup>              |                             |            |            | O <sub>3</sub> [core]2s <sup>1.65</sup> 2p <sup>5.00</sup> 3p <sup>0.01</sup> 4p <sup>0.01</sup>              |            |                             |            |            |
|                                | S <sub>4</sub> <sup>π</sup> [core]3s <sup>1.66</sup> 3p <sup>4.06</sup> 3d <sup>0.02</sup> |                             |            |            | S <sub>4</sub> <sup>π</sup> [core]3s <sup>1.65</sup> 3p <sup>4.08</sup> 3d <sup>0.02</sup>                    |            |                             |            |            |
|                                | N <sub>1</sub> <sup>π</sup> [core]2s <sup>1.30</sup> 2p <sup>4.16</sup> 3p <sup>0.02</sup> |                             |            |            | N <sub>1</sub> <sup>π</sup> [core]2s <sup>1.30</sup> 2p <sup>4.15</sup> 3p <sup>0.01</sup> 4p <sup>0.01</sup> |            |                             |            |            |
|                                | Cl <sub>1</sub> [core]3s <sup>1.98</sup> 3p <sup>5.91</sup>                                |                             |            |            | Cl <sub>1</sub> [core]3s <sup>1.98</sup> 3p <sup>5.91</sup>                                                   |            |                             |            |            |
|                                | O <sub>Cys</sub> [core]2s <sup>1.68</sup> 2p <sup>5.05</sup> 3p <sup>0.01</sup>            |                             |            |            | S <sub>Cys</sub> [core]3s <sup>1.65</sup> 3p <sup>4.08</sup> 3d <sup>0.02</sup>                               |            |                             |            |            |
| <b>O-Cys<sup>-</sup></b>       |                                                                                            |                             |            |            | <b>S-Cys<sup>-</sup></b>                                                                                      |            |                             |            |            |
| <b>Bond</b>                    | <b>WBI</b>                                                                                 | <b>Atoms</b>                | <b>NAC</b> | <b>TNP</b> | <b>Bond</b>                                                                                                   | <b>WBI</b> | <b>Atoms</b>                | <b>NAC</b> | <b>TNP</b> |
| Pd-O <sub>3</sub>              | 0.3870                                                                                     | Pd                          | 0.668      | 45.332     | Pd-O <sub>3</sub>                                                                                             | 0.3348     | Pd                          | 0.341      | 45.659     |
| Pd-S <sub>4</sub> <sup>π</sup> | 0.3870                                                                                     | O <sub>3</sub>              | -0.685     | 8.685      | Pd- S <sub>4</sub> <sup>π</sup>                                                                               | 0.6038     | O <sub>3</sub>              | -0.699     | 8.700      |
| Pd-N <sub>1</sub> <sup>π</sup> | 0.5044                                                                                     | S <sub>4</sub> <sup>π</sup> | 0.241      | 0.241      | Pd-N <sub>1</sub> <sup>π</sup>                                                                                | 0.3939     | S <sub>4</sub> <sup>π</sup> | 0.202      | 15.798     |
| Pd-Cl <sub>1</sub>             | 0.0017                                                                                     | N <sub>1</sub> <sup>π</sup> | -0.488     | 7.488      | Pd-Cl <sub>1</sub>                                                                                            | 0.0007     | N <sub>1</sub> <sup>π</sup> | -0.508     | 7.508      |
|                                |                                                                                            | Cl <sub>1</sub>             | -0.908     | 17.908     |                                                                                                               |            | Cl <sub>1</sub>             | -0.931     | 17.931     |
| Pd-O <sub>Cys</sub>            | 0.3817                                                                                     | O <sub>Cys</sub>            | -0.758     | 8.758      | Pd-S <sub>Cys</sub>                                                                                           | 0.7497     | S <sub>Cys</sub>            | -0.224     | 16.224     |
| NEC                            | Pd[core]5s <sup>0.32</sup> 4d <sup>8.74</sup> 5p <sup>0.26</sup> 5d <sup>0.01</sup>        |                             |            |            | Pd[core]5s <sup>0.36</sup> 4d <sup>8.92</sup> 5p <sup>0.37</sup> 5d <sup>0.01</sup>                           |            |                             |            |            |
|                                | O <sub>3</sub> [core]2s <sup>1.65</sup> 2p <sup>4.99</sup> 3p <sup>0.01</sup>              |                             |            |            | O <sub>3</sub> [core]2s <sup>1.65</sup> 2p <sup>5.03</sup> 3p <sup>0.01</sup>                                 |            |                             |            |            |
|                                | S <sub>4</sub> <sup>π</sup> [core]3s <sup>1.66</sup> 3p <sup>4.06</sup> 3d <sup>0.02</sup> |                             |            |            | S <sub>4</sub> <sup>π</sup> [core]3s <sup>1.64</sup> 3p <sup>4.12</sup> 3d <sup>0.02</sup>                    |            |                             |            |            |
|                                | N <sub>1</sub> <sup>π</sup> [core]2s <sup>1.30</sup> 2p <sup>4.16</sup> 3p <sup>0.01</sup> |                             |            |            | N <sub>1</sub> <sup>π</sup> [core]2s <sup>1.30</sup> 2p <sup>4.17</sup> 3p <sup>0.01</sup>                    |            |                             |            |            |
|                                | Cl <sub>1</sub> [core]3s <sup>1.99</sup> 3p <sup>5.92</sup>                                |                             |            |            | Cl <sub>1</sub> [core]3s <sup>1.99</sup> 3p <sup>5.94</sup>                                                   |            |                             |            |            |
|                                | O <sub>Cys</sub> [core]2s <sup>1.68</sup> 2p <sup>5.06</sup> 3p <sup>0.01</sup>            |                             |            |            | S <sub>Cys</sub> [core]3s <sup>1.72</sup> 3p <sup>4.48</sup> 3d <sup>0.01</sup>                               |            |                             |            |            |

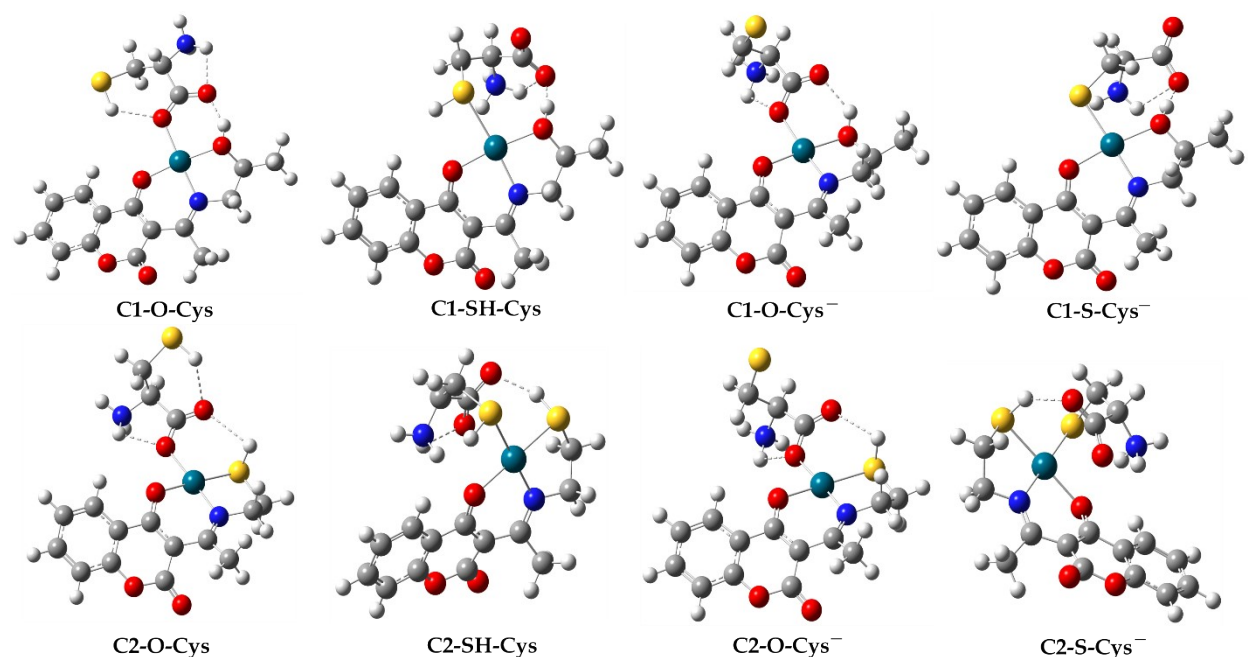

**Figure S12.** Optimized geometries of products formed in the reaction between the investigated compounds, **C1** and **C2**, and acid-base forms of **L-Cys/L-Cys<sup>-</sup>** with intramolecular hydrogen bond (interrupted line) obtained with M06-2X functional in conjunction with 6-311++G(d,p) basis set C, N, O, Cl, and H/def2-TZVPD, triple-zeta-valence, basis set for atom Pd theory in the water. Legend: grey – carbon atom, white – hydrogen atom, red – oxygen atom, blue – nitrogen atom, yellow – sulfur.

**Table S13.** The bond length of the interest, the Wiberg bond indices (WBIs), natural atomic charges (NACs), total natural populations (TNPs, in parentheses), and natural electron (NECs) of selected atoms/ions for products of **C1** compound

| O-Cys                           |                                                                                             |                              |        |        | HS-Cys                                                                                                         |        |                              |        |        |
|---------------------------------|---------------------------------------------------------------------------------------------|------------------------------|--------|--------|----------------------------------------------------------------------------------------------------------------|--------|------------------------------|--------|--------|
| Bond                            | WBI                                                                                         | Atoms                        | NAC    | TNP    | Bond                                                                                                           | WBI    | Atoms                        | NAC    | TNP    |
| Pd-O <sub>3</sub>               | 0.4342                                                                                      | Pd                           | 0.883  | 45.117 | Pd-O <sub>3</sub>                                                                                              | 0.4409 | Pd                           | 0.738  | 45.262 |
| Pd-O <sub>4</sub> <sup>••</sup> | 0.3211                                                                                      | O <sub>3</sub>               | -0.647 | 8.647  | Pd-O <sub>4</sub> <sup>••</sup>                                                                                | 0.3296 | O <sub>3</sub>               | -0.662 | 8.662  |
| Pd-N <sub>1</sub> <sup>••</sup> | 0.5544                                                                                      | O <sub>4</sub> <sup>••</sup> | -0.739 | 8.739  | Pd-N <sub>1</sub> <sup>••</sup>                                                                                | 0.5303 | O <sub>4</sub> <sup>••</sup> | -0.750 | 8.750  |
| Pd-O <sub>Cys</sub>             | 0.3236                                                                                      | N <sub>1</sub> <sup>••</sup> | -0.479 | 7.479  | Pd-S <sub>Cys</sub>                                                                                            | 0.4618 | N <sub>1</sub> <sup>••</sup> | -0.476 | 7.476  |
|                                 |                                                                                             | O <sub>Cys</sub>             | -0.722 | 8.724  |                                                                                                                |        | S <sub>Cys</sub>             | 0.131  | 15.869 |
| NEC                             | Pd[core]5s <sup>0.28</sup> 4d <sup>8.63</sup> 5p <sup>0.20</sup> 5d <sup>0.01</sup>         |                              |        |        | Pd[core]5s <sup>0.30</sup> 4d <sup>8.71</sup> 5p <sup>0.24</sup> 5d <sup>0.01</sup>                            |        |                              |        |        |
|                                 | O <sub>3</sub> [core]2s <sup>1.65</sup> 2p <sup>4.98</sup> 3p <sup>0.01</sup>               |                              |        |        | O <sub>3</sub> [core]2s <sup>1.65</sup> 2p <sup>4.99</sup> 3p <sup>0.01</sup>                                  |        |                              |        |        |
|                                 | O <sub>4</sub> <sup>••</sup> [core]2s <sup>1.65</sup> 2p <sup>5.08</sup> 3p <sup>0.01</sup> |                              |        |        | O <sub>4</sub> <sup>••</sup> [core]2s <sup>1.65</sup> 2p <sup>5.08</sup> 3p <sup>0.01</sup>                    |        |                              |        |        |
|                                 | N <sub>1</sub> <sup>••</sup> [core]2s <sup>1.29</sup> 2p <sup>4.17</sup> 3p <sup>0.01</sup> |                              |        |        | N <sub>1</sub> <sup>••</sup> [core]2s <sup>1.29</sup> 2p <sup>4.16</sup> 3p <sup>0.01</sup>                    |        |                              |        |        |
|                                 | O <sub>Cys</sub> [core]2s <sup>1.68</sup> 2p <sup>5.03</sup> 3p <sup>0.01</sup>             |                              |        |        | S <sub>Cys</sub> [core]3s <sup>1.67</sup> 3p <sup>4.17</sup> 3d <sup>0.02</sup>                                |        |                              |        |        |
| O-Cys <sup>-</sup>              |                                                                                             |                              |        |        | S-Cys <sup>-</sup>                                                                                             |        |                              |        |        |
| Bond                            | WBI                                                                                         | Atoms                        | NAC    | TNP    | Bond                                                                                                           | WBI    | Atoms                        | NAC    | TNP    |
| Pd-O <sub>3</sub>               | 0.4325                                                                                      | Pd                           | 0.882  | 45.188 | Pd-O <sub>3</sub>                                                                                              | 0.4179 | Pd                           | 0.625  | 45.375 |
| Pd-O <sub>4</sub> <sup>••</sup> | 0.3117                                                                                      | O <sub>3</sub>               | -0.651 | 8.651  | Pd-O <sub>4</sub> <sup>••</sup>                                                                                | 0.3238 | O <sub>3</sub>               | -0.656 | 8.656  |
| Pd-N <sub>1</sub> <sup>••</sup> | 0.5403                                                                                      | O <sub>4</sub> <sup>••</sup> | -0.733 | 8.733  | Pd-N <sub>1</sub> <sup>••</sup>                                                                                | 0.4328 | O <sub>4</sub> <sup>••</sup> | -0.769 | 8.769  |
| Pd-O <sub>Cys</sub>             | 0.3401                                                                                      | N <sub>1</sub> <sup>••</sup> | -0.482 | 7.482  | Pd-S <sub>Cys</sub>                                                                                            | 0.7149 | N <sub>1</sub> <sup>••</sup> | -0.503 | 7.504  |
|                                 |                                                                                             | O <sub>Cys</sub>             | -0.766 | 8.766  |                                                                                                                |        | S <sub>Cys</sub>             | -0.245 | 16.245 |
| NEC                             | Pd[core]5s <sup>0.28</sup> 4d <sup>8.62</sup> 5p <sup>0.20</sup> 5d <sup>0.01</sup>         |                              |        |        | Pd[core]5s <sup>0.32</sup> 4d <sup>8.76</sup> 5p <sup>0.28</sup> 5d <sup>0.01</sup>                            |        |                              |        |        |
|                                 | O <sub>3</sub> [core]2s <sup>1.65</sup> 2p <sup>4.98</sup> 3p <sup>0.01</sup>               |                              |        |        | O <sub>3</sub> [core]2s <sup>1.64</sup> 2p <sup>4.99</sup> 3p <sup>0.01</sup>                                  |        |                              |        |        |
|                                 | O <sub>4</sub> <sup>••</sup> [core]2s <sup>1.64</sup> 2p <sup>5.08</sup> 3p <sup>0.01</sup> |                              |        |        | O <sub>4</sub> <sup>••</sup> [core]2s <sup>1.64</sup> 2p <sup>5.11</sup> 3p <sup>0.01</sup>                    |        |                              |        |        |
|                                 | N <sub>1</sub> <sup>••</sup> [core]2s <sup>1.29</sup> 2p <sup>4.17</sup> 3p <sup>0.01</sup> |                              |        |        | N <sub>1</sub> <sup>••</sup> [core]2s <sup>1.30</sup> 2p <sup>4.18</sup> 4s <sup>0.01</sup> 4p <sup>0.01</sup> |        |                              |        |        |
|                                 | O <sub>Cys</sub> [core]2s <sup>1.69</sup> 2p <sup>5.06</sup> 3p <sup>0.01</sup>             |                              |        |        | S <sub>Cys</sub> [core]3s <sup>1.74</sup> 3p <sup>4.48</sup> 3d <sup>0.01</sup>                                |        |                              |        |        |

**Table S14.** The bond length of the interest, the Wiberg bond indices (WBIs), natural atomic charges (NACs), total natural populations (TNPs, in parentheses), and natural electron (NECs) of selected atoms/ions for products of **C2** compound

| O–Cys                           |                                                                                              |                              |        |        | HS–Cys                                                                                       |        |                              |        |        |
|---------------------------------|----------------------------------------------------------------------------------------------|------------------------------|--------|--------|----------------------------------------------------------------------------------------------|--------|------------------------------|--------|--------|
| Bond                            | WBI                                                                                          | Atoms                        | NAC    | TNP    | Bond                                                                                         | WBI    | Atoms                        | NAC    | TNP    |
| Pd-O <sub>3</sub>               | 0.3877                                                                                       | Pd                           | 0.677  | 45.323 | Pd-O <sub>3</sub>                                                                            | 0.3745 | Pd                           | 0.454  | 45.546 |
| Pd-S <sub>4</sub> <sup>••</sup> | 0.5953                                                                                       | O <sub>3</sub>               | -0.658 | 8.658  | Pd-S <sub>4</sub> <sup>••</sup>                                                              | 0.6359 | O <sub>3</sub>               | -0.739 | 8.645  |
| Pd-N <sub>1</sub> <sup>••</sup> | 0.5215                                                                                       | S <sub>4</sub> <sup>••</sup> | 0.244  | 15.756 | Pd-N <sub>1</sub> <sup>••</sup>                                                              | 0.4870 | S <sub>4</sub> <sup>••</sup> | 0.216  | 15.784 |
| Pd-O <sub>Cys</sub>             | 0.3528                                                                                       | N <sub>1</sub> <sup>••</sup> | -0.482 | 7.482  | Pd-S <sub>4</sub> <sup>••</sup>                                                              | 0.5193 | N <sub>1</sub> <sup>••</sup> | -0.484 | 7.484  |
|                                 |                                                                                              | O <sub>Cys</sub>             | -0.748 | 8.748  |                                                                                              |        | S <sub>Cys</sub>             | 0.191  | 15.809 |
| NEC                             | Pd[core]5s <sup>0.32</sup> 4d <sup>8.74</sup> 5p <sup>0.26</sup> 5d <sup>0.01</sup>          |                              |        |        | Pd[core]5s <sup>0.35</sup> 4d <sup>8.86</sup> 5p <sup>0.32</sup> 5d <sup>0.02</sup>          |        |                              |        |        |
|                                 | O <sub>3</sub> [core]2s <sup>1.65</sup> 2p <sup>4.99</sup> 3p <sup>0.01</sup>                |                              |        |        | O <sub>3</sub> [core]2s <sup>1.65</sup> 2p <sup>5.04</sup> 3p <sup>0.03</sup>                |        |                              |        |        |
|                                 | S <sub>4</sub> <sup>••</sup> [core] 3s <sup>1.66</sup> 3p <sup>4.06</sup> 3d <sup>0.02</sup> |                              |        |        | S <sub>4</sub> <sup>••</sup> [core] 3s <sup>1.64</sup> 3p <sup>4.11</sup> 3d <sup>0.02</sup> |        |                              |        |        |
|                                 | N <sub>1</sub> <sup>••</sup> [core]2s <sup>1.29</sup> 2p <sup>4.17</sup> 3p <sup>0.01</sup>  |                              |        |        | N <sub>1</sub> <sup>••</sup> [core]2s <sup>1.30</sup> 2p <sup>4.16</sup> 3p <sup>0.02</sup>  |        |                              |        |        |
|                                 | O <sub>Cys</sub> [core] 2s <sup>1.68</sup> 2p <sup>5.05</sup> 3p <sup>0.01</sup>             |                              |        |        | S <sub>Cys</sub> [core]3s <sup>1.65</sup> 3p <sup>4.13</sup> 3d <sup>0.02</sup>              |        |                              |        |        |
| O–Cys <sup>-</sup>              |                                                                                              |                              |        |        | S–Cys <sup>-</sup>                                                                           |        |                              |        |        |
| Bond                            | WBI                                                                                          | Atoms                        | NAC    | TNP    | Bond                                                                                         | WBI    | Atoms                        | NAC    | TNP    |
| Pd-O <sub>3</sub>               | 0.3842                                                                                       | Pd                           | 0.670  | 45.330 | Pd-O <sub>3</sub>                                                                            | 0.3446 | Pd                           | 0.346  | 45.654 |
| Pd-S <sub>4</sub> <sup>••</sup> | 0.5962                                                                                       | O <sub>3</sub>               | -0.656 | 8.656  | Pd-S <sub>4</sub> <sup>••</sup>                                                              | 0.6044 | O <sub>3</sub>               | -0.727 | 8.727  |
| Pd-N <sub>1</sub> <sup>••</sup> | 0.5116                                                                                       | S <sub>4</sub> <sup>••</sup> | 0.246  | 15.755 | Pd-N <sub>1</sub> <sup>••</sup>                                                              | 0.3955 | S <sub>4</sub> <sup>••</sup> | 0.213  | 15.787 |
| Pd-O <sub>Cys</sub>             | 0.3726                                                                                       | N <sub>1</sub> <sup>••</sup> | -0.486 | 7.486  | Pd-S <sub>4</sub> <sup>••</sup>                                                              | 0.7377 | N <sub>1</sub> <sup>••</sup> | -0.511 | 7.511  |
|                                 |                                                                                              | O <sub>Cys</sub>             | -0.758 | 8.758  |                                                                                              |        | S <sub>Cys</sub>             | -0.217 | 16.217 |
| NEC                             | Pd[core]5s <sup>0.32</sup> 4d <sup>8.74</sup> 5p <sup>0.26</sup> 5d <sup>0.01</sup>          |                              |        |        | Pd[core]5s <sup>0.36</sup> 4d <sup>8.92</sup> 5p <sup>0.36</sup> 5d <sup>0.02</sup>          |        |                              |        |        |
|                                 | O <sub>3</sub> [core]2s <sup>1.65</sup> 2p <sup>4.99</sup> 3p <sup>0.01</sup>                |                              |        |        | O <sub>3</sub> [core]2s <sup>1.65</sup> 2p <sup>5.03</sup> 3p <sup>0.01</sup>                |        |                              |        |        |
|                                 | S <sub>4</sub> <sup>••</sup> [core] 3s <sup>1.66</sup> 3p <sup>4.06</sup> 3d <sup>0.02</sup> |                              |        |        | S <sub>4</sub> <sup>••</sup> [core] 3s <sup>1.64</sup> 3p <sup>4.11</sup> 3d <sup>0.02</sup> |        |                              |        |        |
|                                 | N <sub>1</sub> <sup>••</sup> [core]2s <sup>1.30</sup> 2p <sup>4.16</sup> 3p <sup>0.02</sup>  |                              |        |        | N <sub>1</sub> <sup>••</sup> [core]2s <sup>1.30</sup> 2p <sup>4.18</sup> 3p <sup>0.01</sup>  |        |                              |        |        |
|                                 | O <sub>Cys</sub> [core] 2s <sup>1.68</sup> 2p <sup>5.06</sup> 3p <sup>0.01</sup>             |                              |        |        | S <sub>Cys</sub> [core]3s <sup>1.72</sup> 3p <sup>4.47</sup> 3d <sup>0.02</sup>              |        |                              |        |        |

**Table S15.** Calculated values of kinetic parameters: Gibbs activation energy ( $\Delta G_a$ ), reaction rate constants ( $k$ ), effective values of rate constants ( $k^{\text{eff}}$ ) and the sum of effective values of rate constants ( $k^{\text{eff, sum}}$ ) [ $\text{M}^{-1}\text{s}^{-1}$ ] estimated at 288 K and 298 K.



| <b>C1</b>          | $k_{288}$          | $k_{288}^{\text{eff}}$ | $k_{288}^{\text{eff, sum}}$ | $\Gamma_i$ (%) | $k_{298}$          | $k_{298}^{\text{eff}}$ | $k_{298}^{\text{eff, sum}}$ | $\Gamma_i$ (%) |
|--------------------|--------------------|------------------------|-----------------------------|----------------|--------------------|------------------------|-----------------------------|----------------|
| O-Cys              | $5.60 \times 10^3$ | $4.83 \times 10^3$     | $4.94 \times 10^4$          | 9.8            | $6.30 \times 10^3$ | $5.44 \times 10^3$     | $6.13 \times 10^4$          | 8.9            |
| HS-Cys             | $9.30 \times 10^2$ | $8.03 \times 10^2$     |                             | 1.6            | $1.20 \times 10^3$ | $1.04 \times 10^3$     |                             | 1.7            |
| O-Cys <sup>-</sup> | $9.90 \times 10^3$ | $1.35 \times 10^3$     |                             | 2.7            | $1.10 \times 10^4$ | $1.50 \times 10^3$     |                             | 2.5            |
| S-Cys <sup>-</sup> | $3.10 \times 10^5$ | $4.24 \times 10^4$     |                             | 85.8           | $3.90 \times 10^5$ | $5.33 \times 10^4$     |                             | 87.0           |
| <b>C2</b>          | $k_{288}$          |                        | $k_{288}^{\text{eff}}$      |                | $k_{298}$          |                        | $k_{298}^{\text{eff}}$      |                |
| O-Cys              | $8.80 \times 10^4$ | $7.60 \times 10^4$     | $8.16 \times 10^4$          | 93.1           | $9.70 \times 10^4$ | $8.37 \times 10^4$     | $9.01 \times 10^4$          | 92.9           |
| HS-Cys             | $1.90 \times 10^3$ | $1.64 \times 10^3$     |                             | 2.0            | $2.30 \times 10^3$ | $1.99 \times 10^3$     |                             | 2.2            |
| O-Cys <sup>-</sup> | $3.20 \times 10^2$ | $4.38 \times 10^1$     |                             | 0.1            | $4.30 \times 10^2$ | $5.88 \times 10^1$     |                             | 0.1            |
| S-Cys <sup>-</sup> | $2.90 \times 10^4$ | $3.97 \times 10^3$     |                             | 4.9            | $3.20 \times 10^4$ | $4.38 \times 10^3$     |                             | 4.9            |

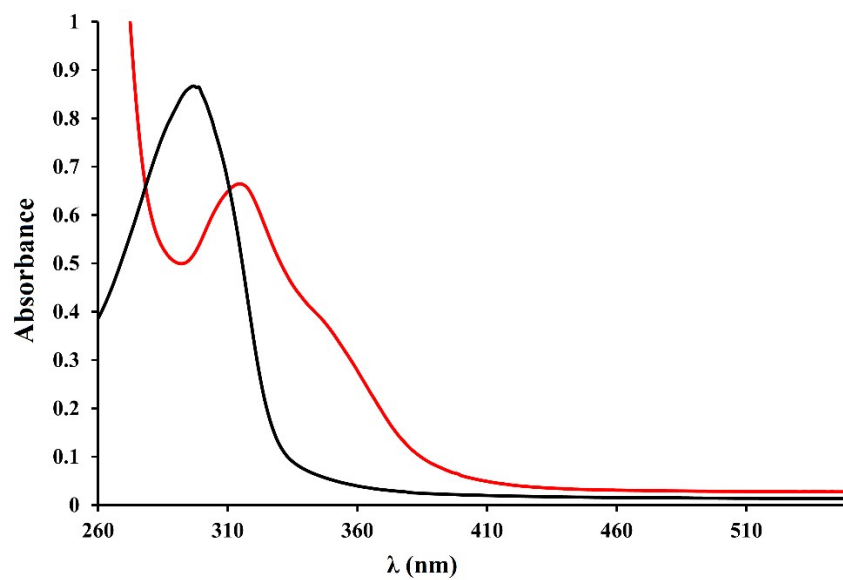

**Figure S13.** Experimental UV-Vis spectra in Hepes buffer (25 mM Hepes and 50 mM NaCl) of **C1** (red line) and the mixture of **C1** and L-Cys in the ratio 1:1 (black line)

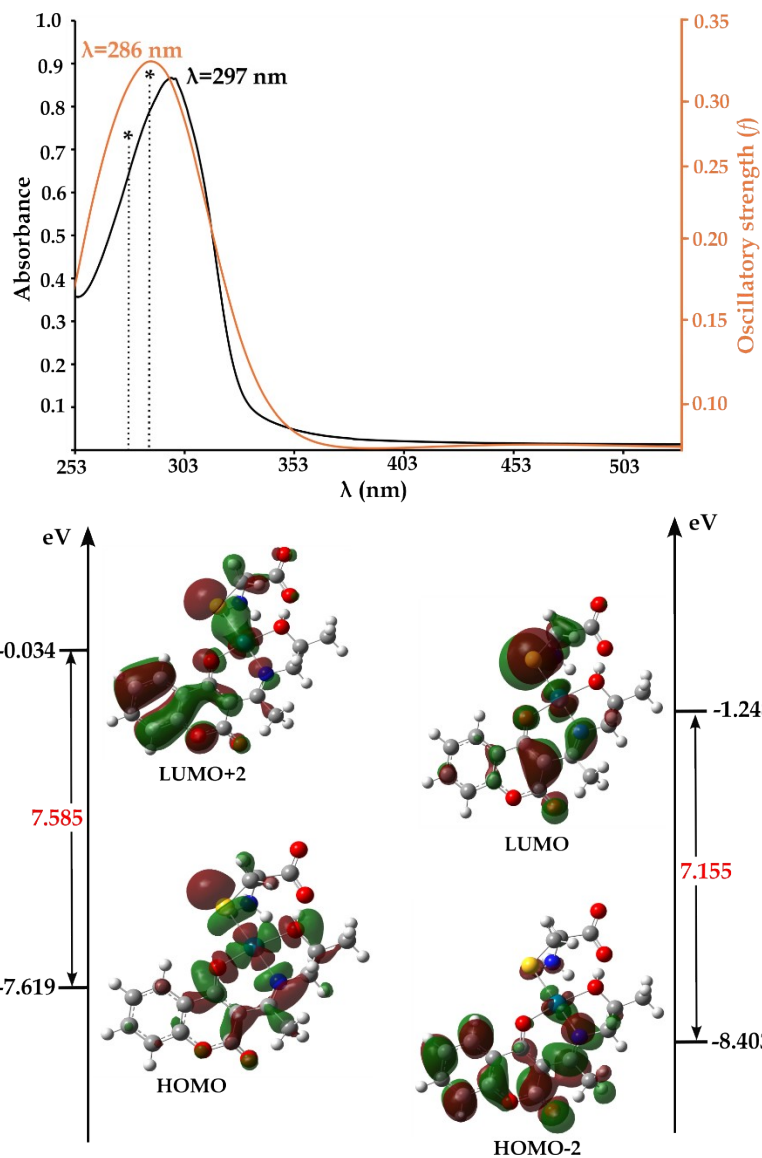

**Figure S14.** Experimental UV-Vis spectrum in Hepes buffer (25 mM Hepes and 50 mM NaCl) of a 1:1 mixture of **C1** and L-Cys (black line) and simulated spectrum of the **C1-S-Cys<sup>-</sup>** product (orange line). The HOMO and LUMO orbitals involved in electronic transitions are presented with values of orbital energies (black colour) and energy gap (red colour). The sign "\*" and the vertical dashed line represent the oscillator strength value.

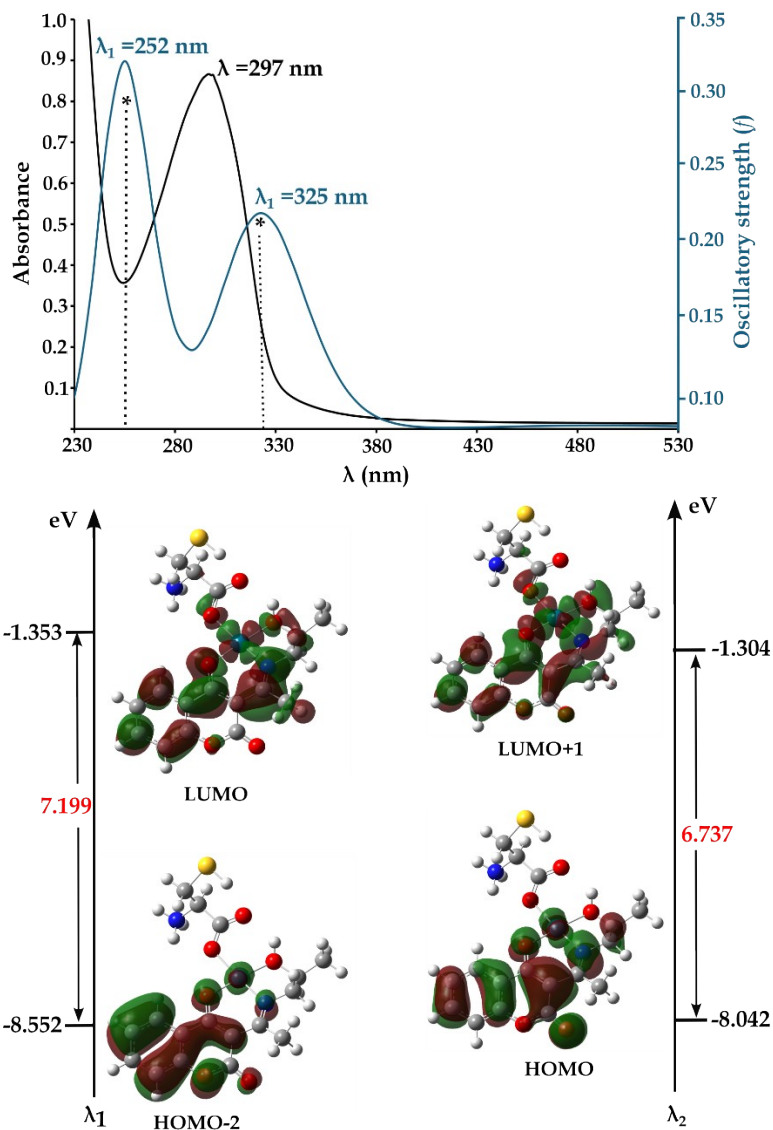

**Figure S15.** Experimental UV-Vis spectrum in Hepes buffer (25 mM Hepes and 50 mM NaCl) of a 1:1 mixture of **C1** and L-Cys (black line) and simulated spectrum of the **C1-O-Cys** product (blue line). The HOMO and LUMO orbitals involved in electronic transitions are presented with values of orbital energies (black colour) and energy gap (red colour). The sign "\*" and the vertical dashed line represent the oscillator strength value.

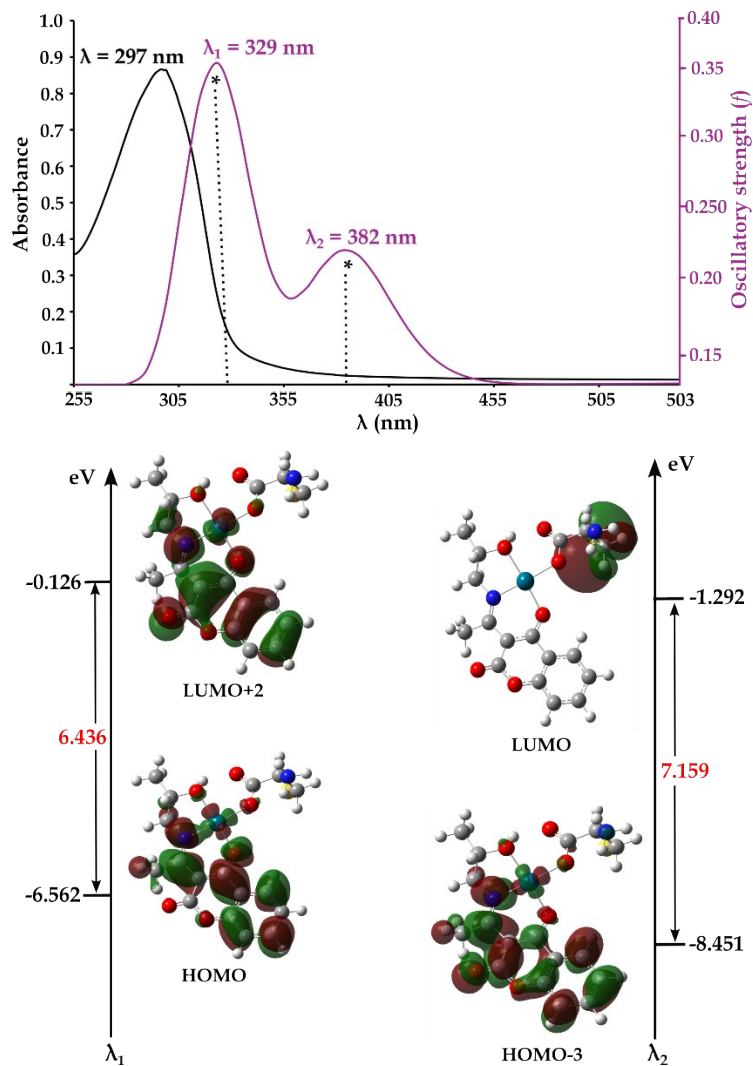

**Figure S16.** Experimental UV-Vis spectrum in Hepes buffer (25 mM Hepes and 50 mM NaCl) of a 1:1 mixture of **C1** and L-Cys (black line) and simulated spectrum of the **C1-O-Cys<sup>-</sup>** product (purple line). The HOMO and LUMO orbitals involved in electronic transitions are presented with values of orbital energies (black colour) and energy gap (red colour). The sign "\*" and the vertical dashed line represent the oscillator strength value.

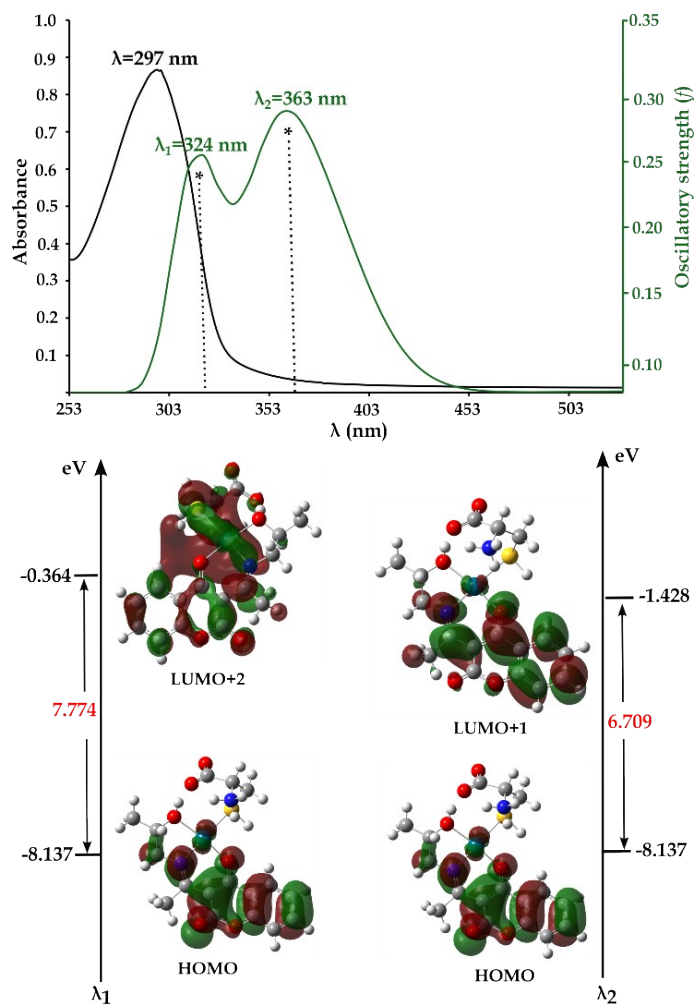

**Figure S17.** Experimental UV-Vis spectrum in Hepes buffer (25 mM Hepes and 50 mM NaCl) of a 1:1 mixture of **C1** and L-Cys (black line) and simulated spectrum of the **C1-HS-Cys** product (green line). The HOMO and LUMO orbitals involved in electronic transitions are presented with values of orbital energies (black colour) and energy gap (red colour). The sign "\*" and the vertical dashed line represent the oscillator strength value.
